# Supplementary material for: Syntheses and anti-cancer activity of CO-releasing molecules with targeting galactose receptors
Source: Royal Society of Chemistry journal article supplement (doi:10.1039/c8ob01921e), 2018-01-01

## Syntheses, anti-cancer activity of CO-releasing molecules with targeting galactose receptor

Jili Li <sup>a</sup>, Jinlong Zhang <sup>a</sup>, Qiuping Zhang <sup>a</sup>, Zhongjie Bai<sup>a</sup>, Quanyi Zhao <sup>a\*</sup>, Dian He <sup>a</sup>, Zhen Wang <sup>a</sup>, Yonglin Chen<sup>b</sup>, Bin Liu <sup>c</sup>

(*a* Institute of Medicinal Chemistry, School of Pharmacy of Lanzhou University; *b* The First Affiliated Hospital of Lanzhou University; *c* School of Stomatology of Lanzhou University, Lanzhou 730000, China)

### Experiments

**SI-Fig. 1** The typical changes in the electronic spectrum of myoglobin as CO releasing from the different kinds of complexes (myoglobin binds one CO molecule to form carbonyl myoglobin).

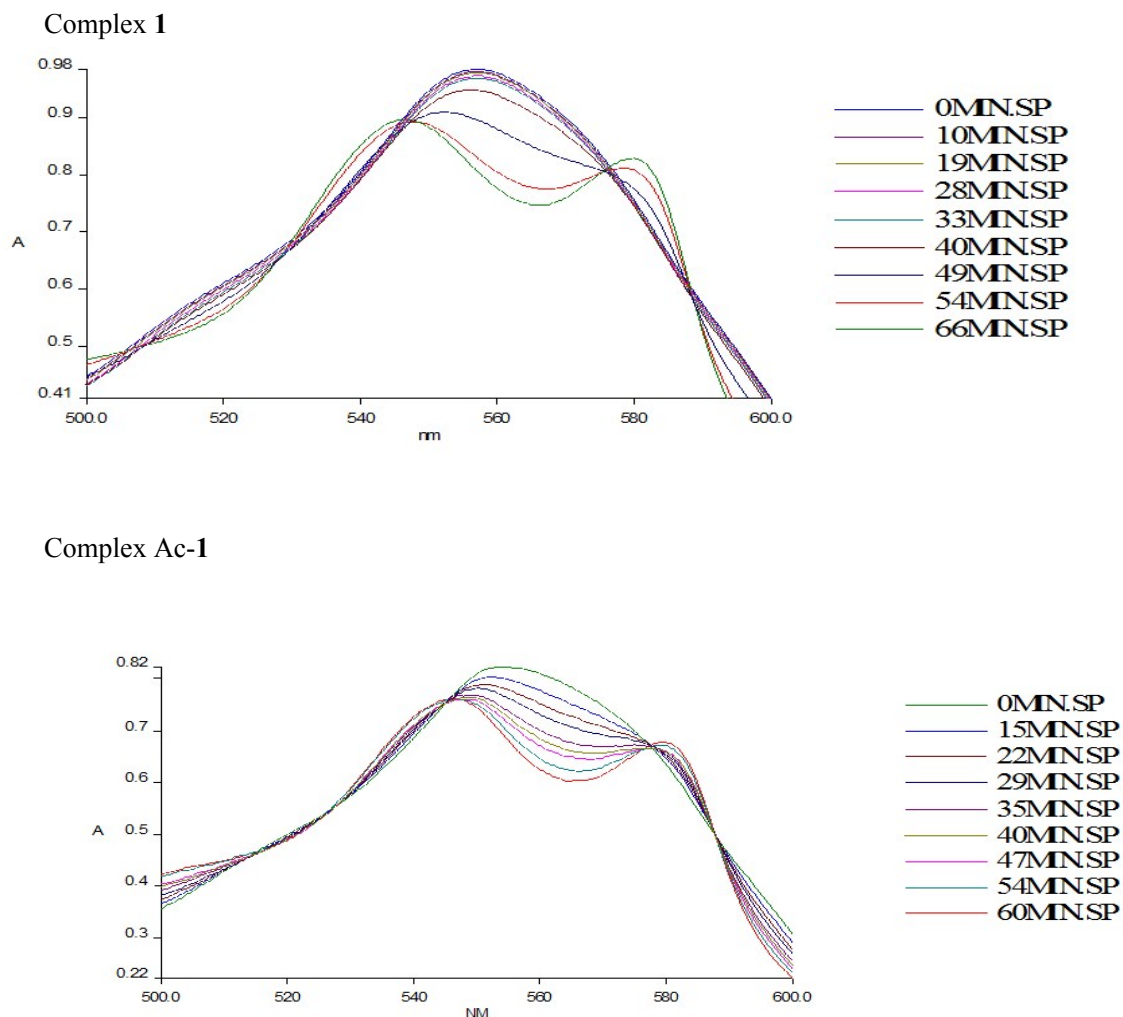

\* Corresponding author. Tel.: +869318915686; fax: +869318915686.

E-mail address: [zhaoqy@lzu.edu.cn](mailto:zhaoqy@lzu.edu.cn)

Complex 2

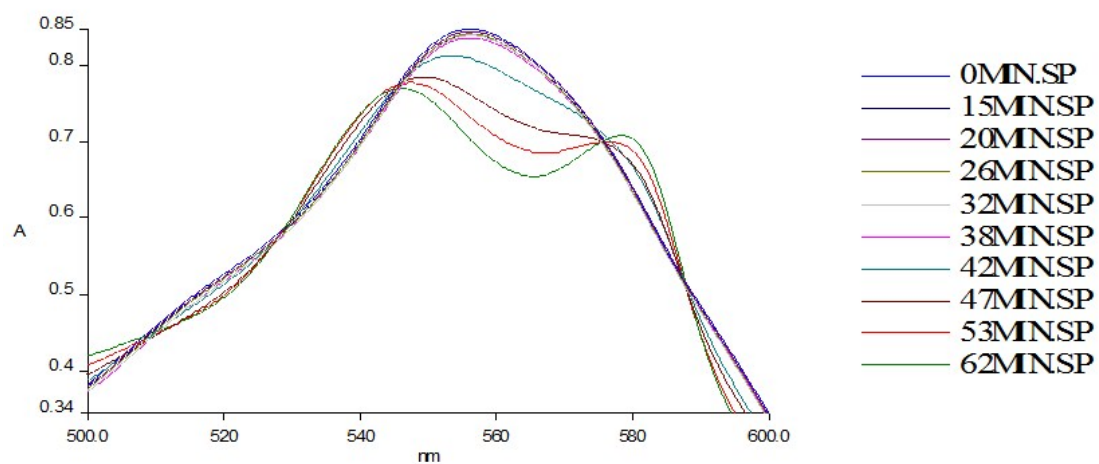

ComplexAc- 2

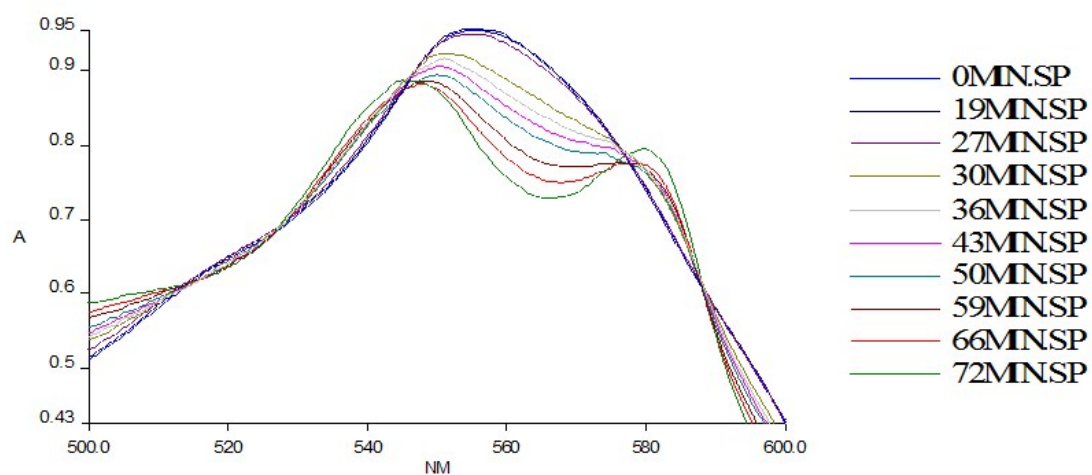

Complex 3

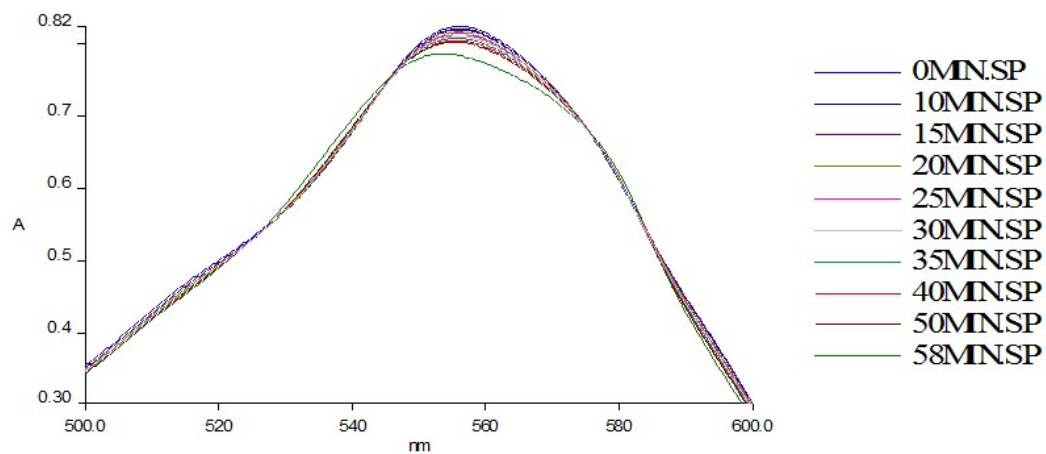

Complex Ac-3

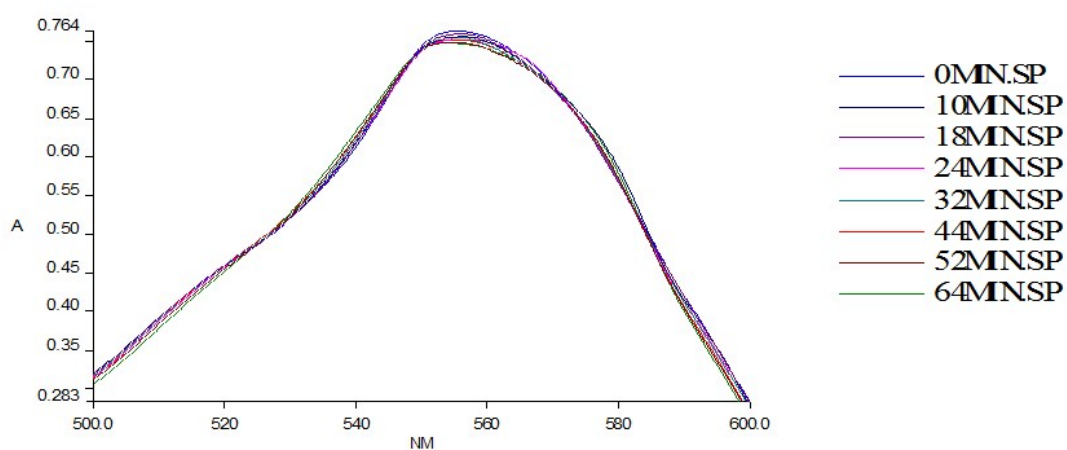

Complex 4

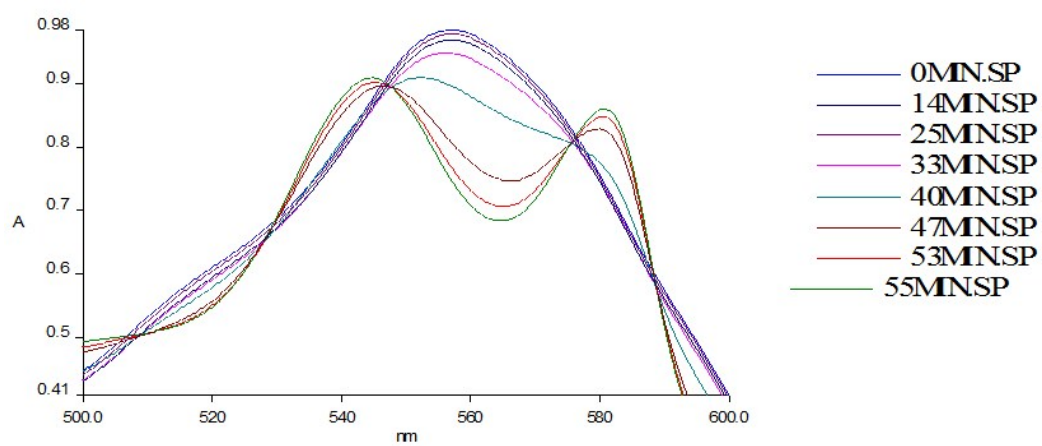

Complex Ac-4

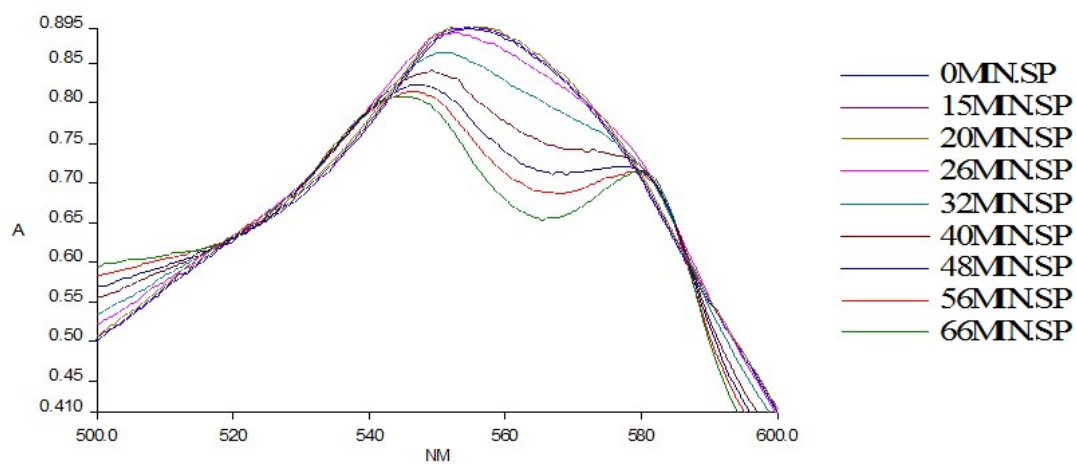

Complex 5

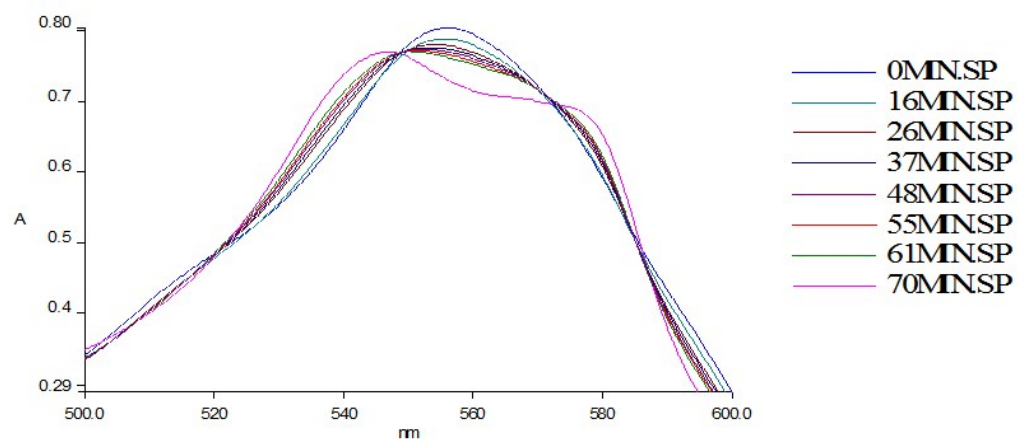

Complex Ac-5

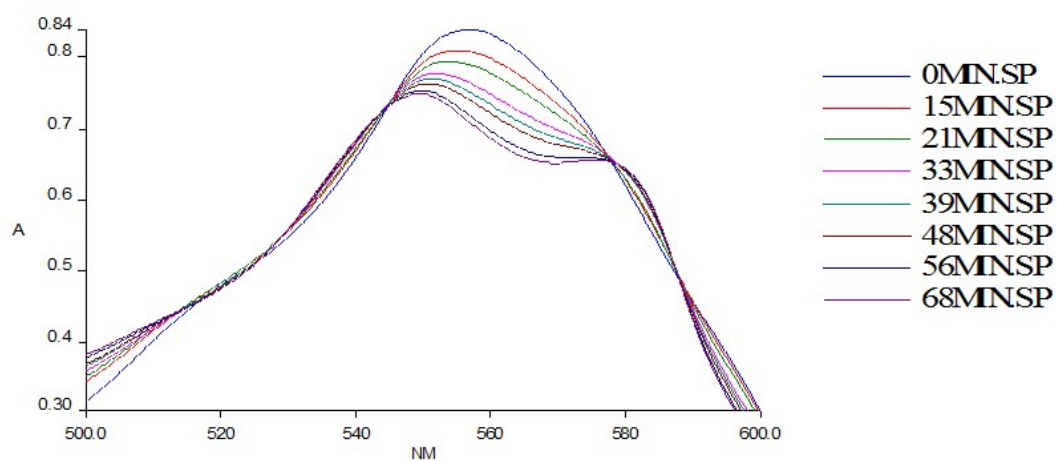

Complex 6

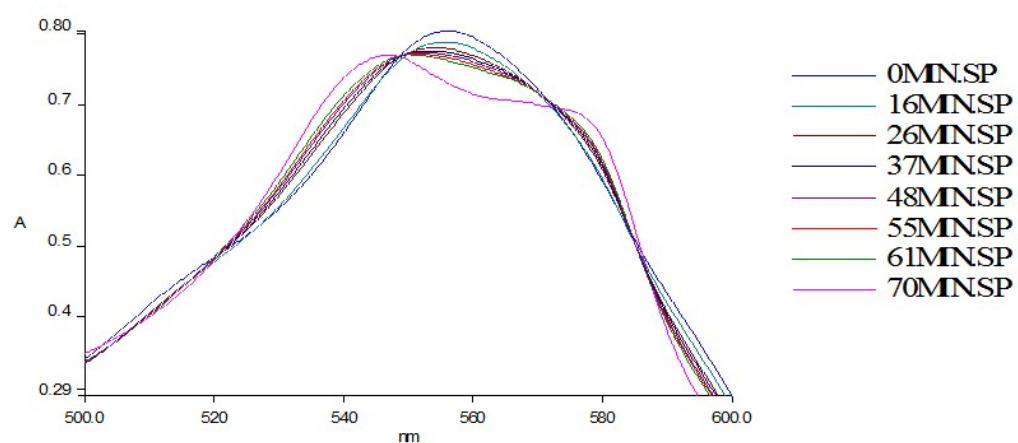

Complex AC-6

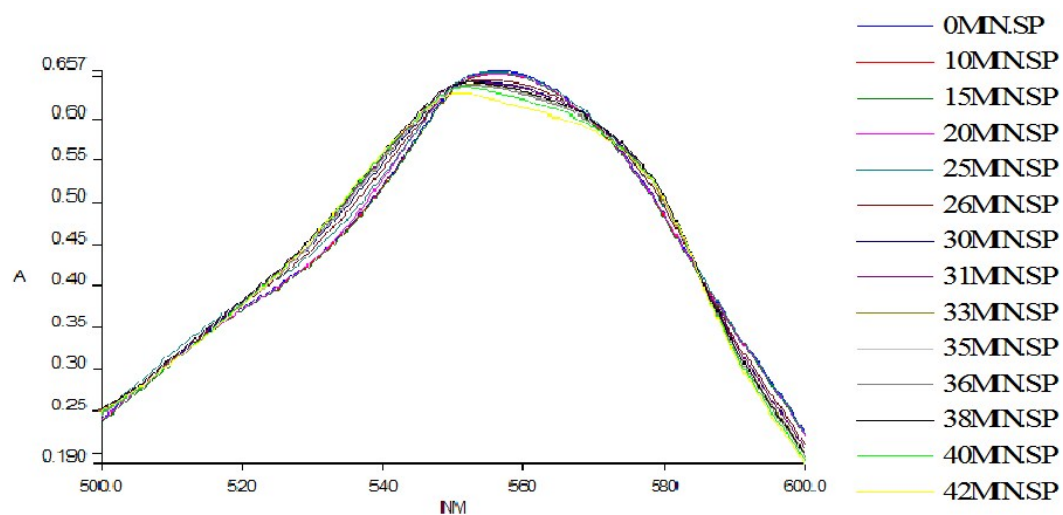

Complex 7

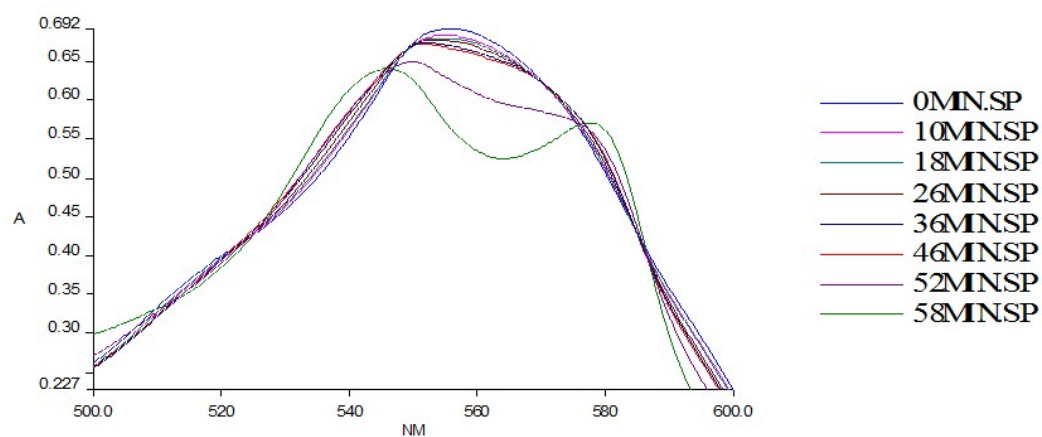

Complex Ac-7

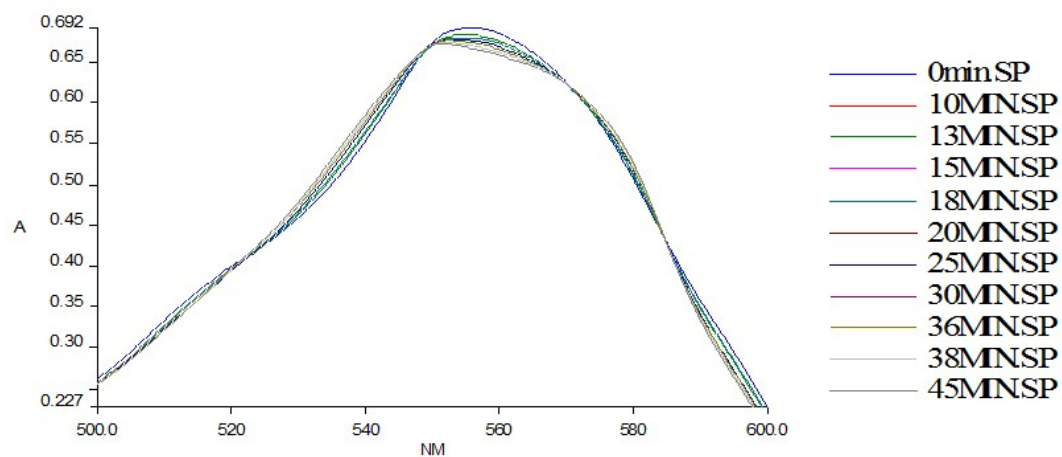

### Complex 8

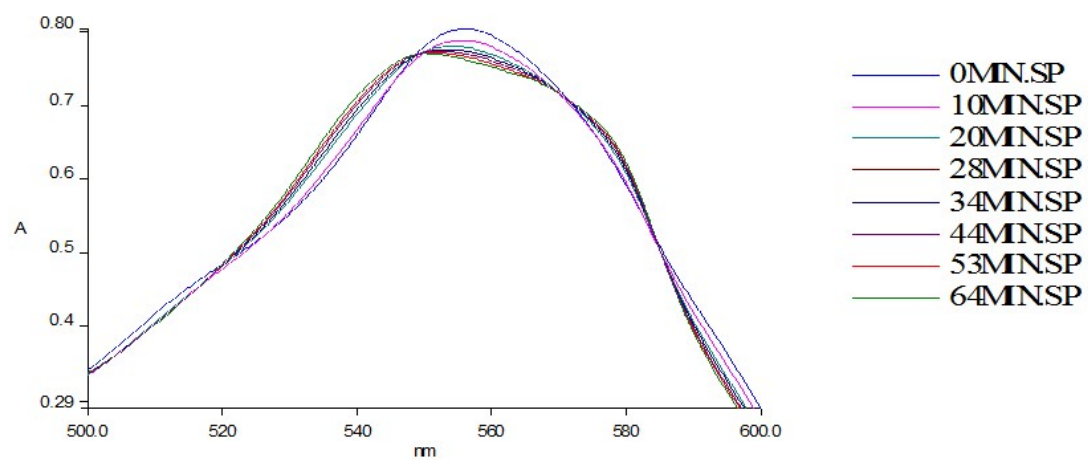

### Complex Ac-8

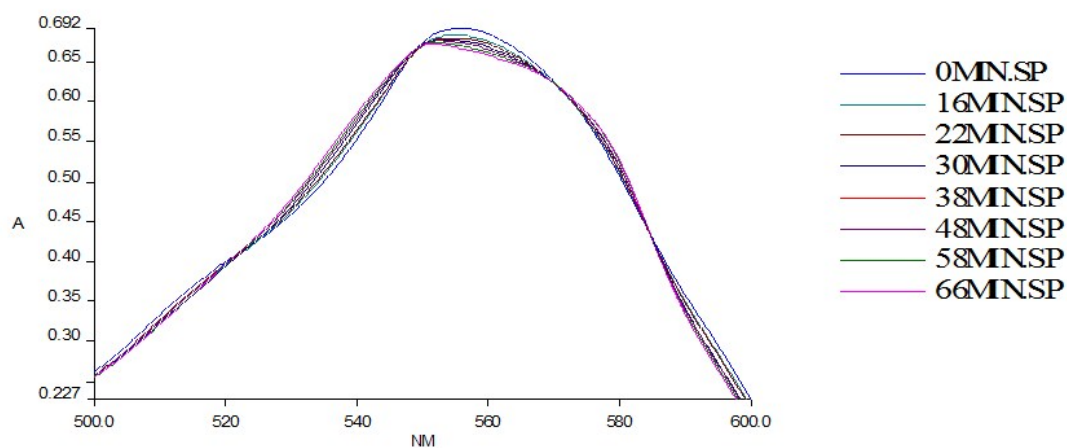

### Complex 9

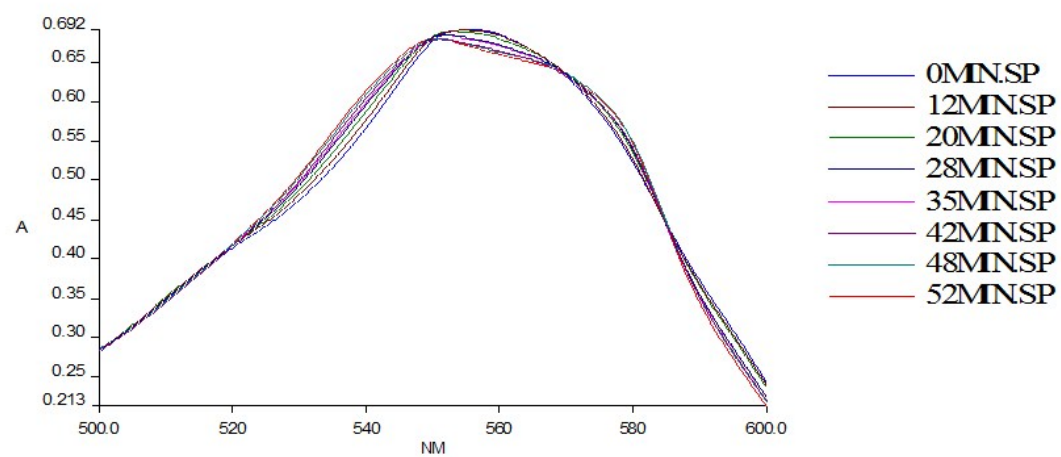



### Complex Ac-9

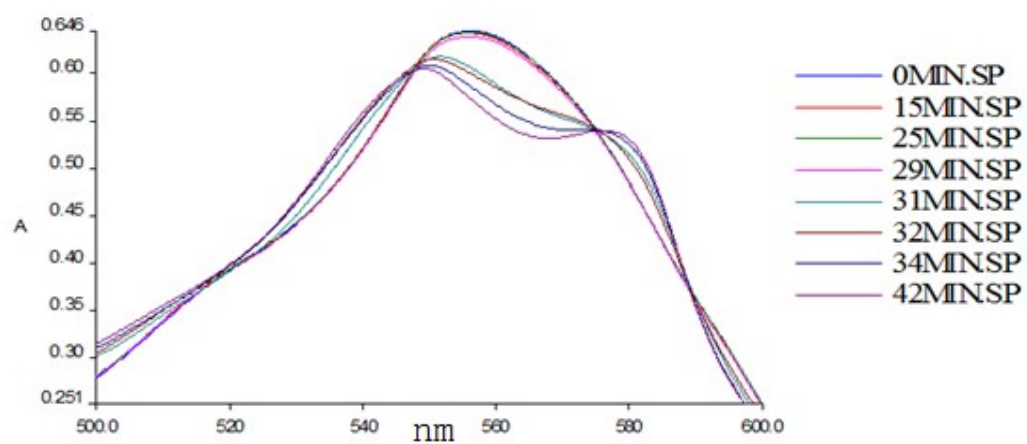

### Complex 10

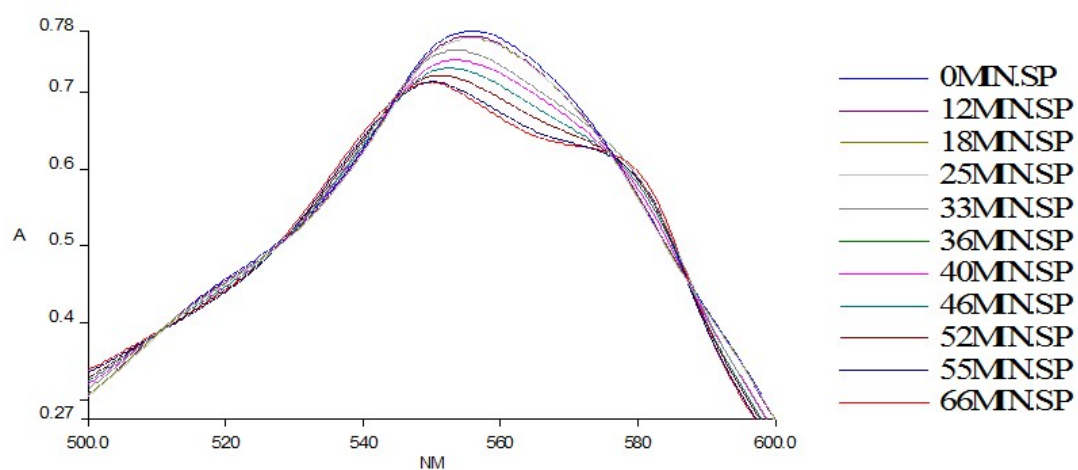

### ComplexAc- 10

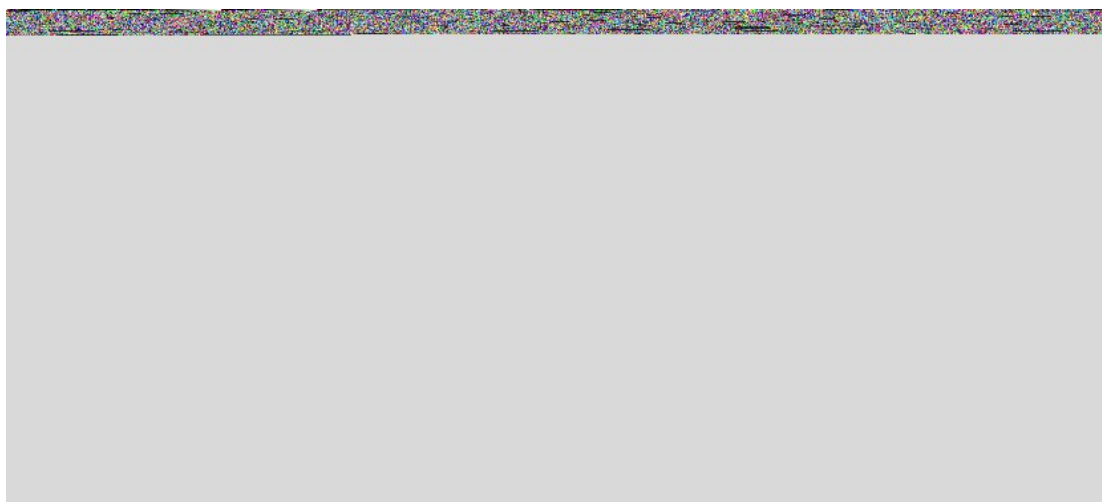

**SI-Figure 2**  $^1\text{H}$ -NMR,  $^{13}\text{C}$ NMR and ESI-HRMS of complex 1  
The ESI-HRMS of complex 1

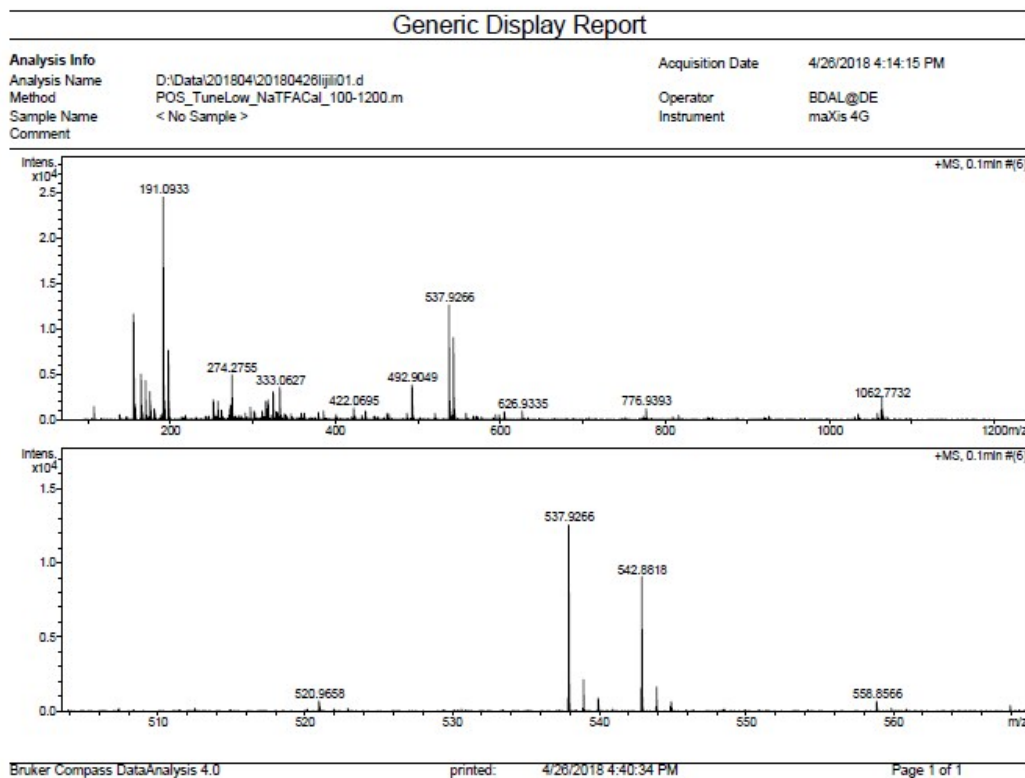

The  $^1\text{H}$ -NMR of complex 1.

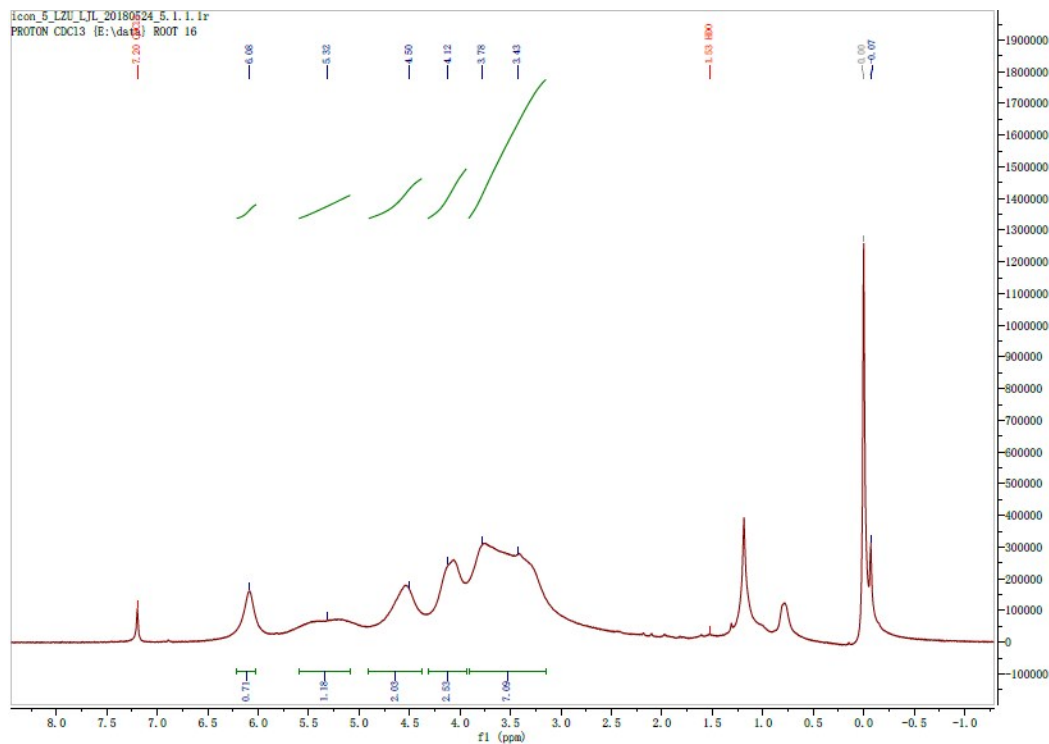



## The $^{13}\text{C}$ NMR of complex 1

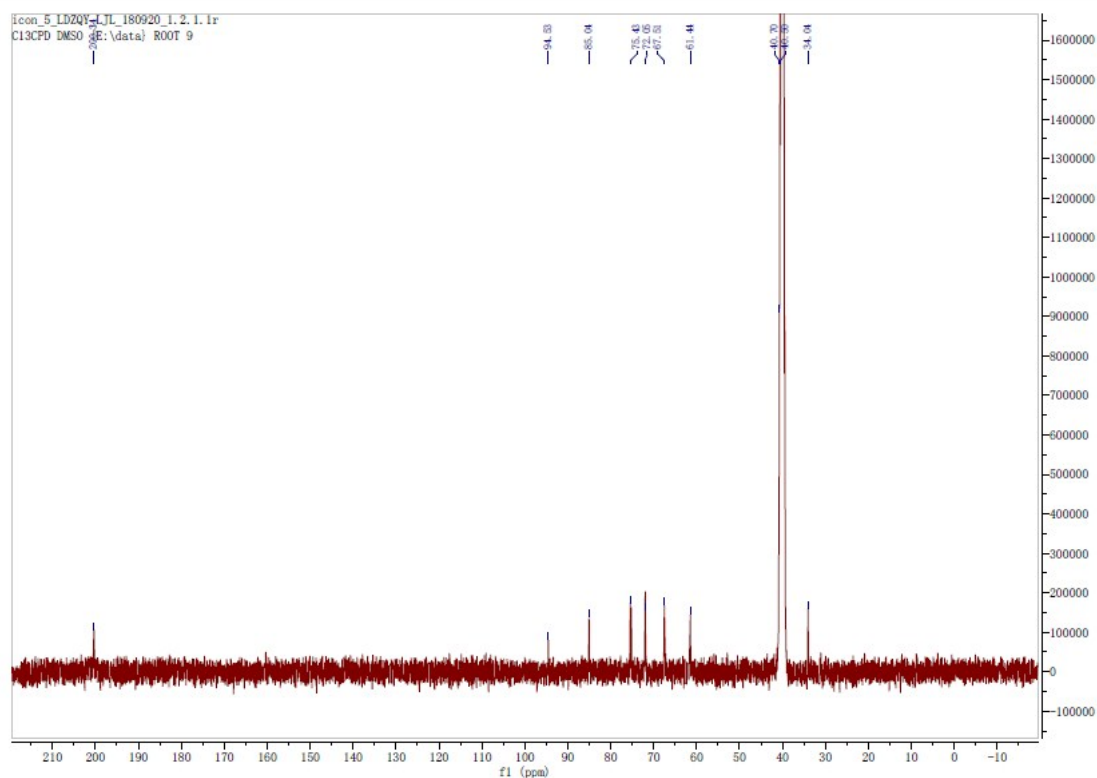

## The ESI-HRMS of complex Ac-1

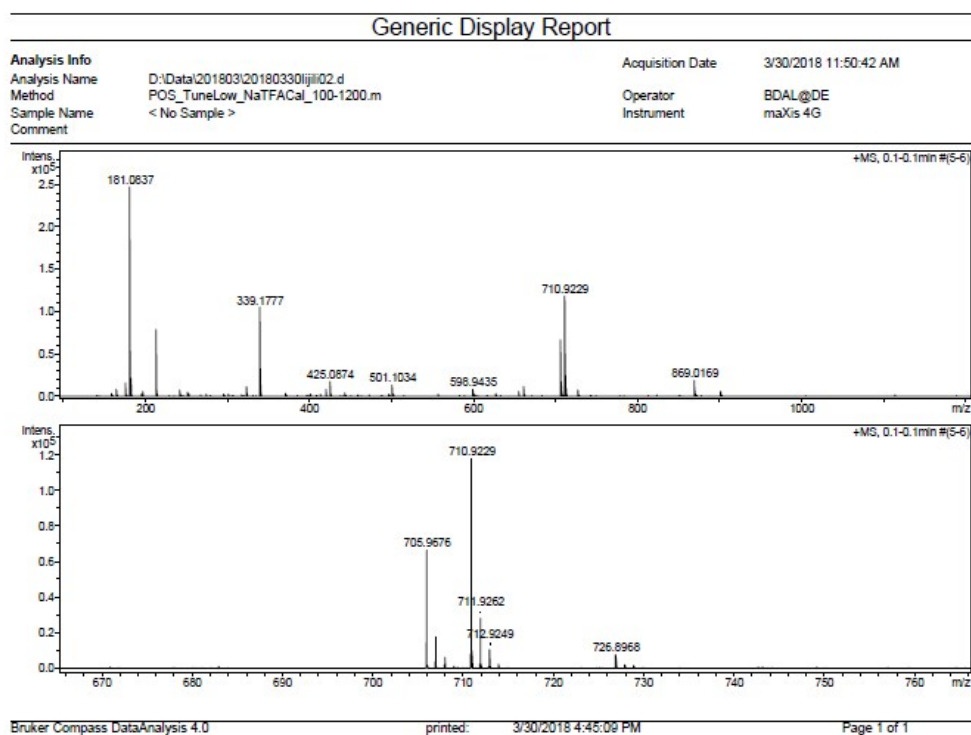

The <sup>1</sup>H-NMR of complex Ac-1.

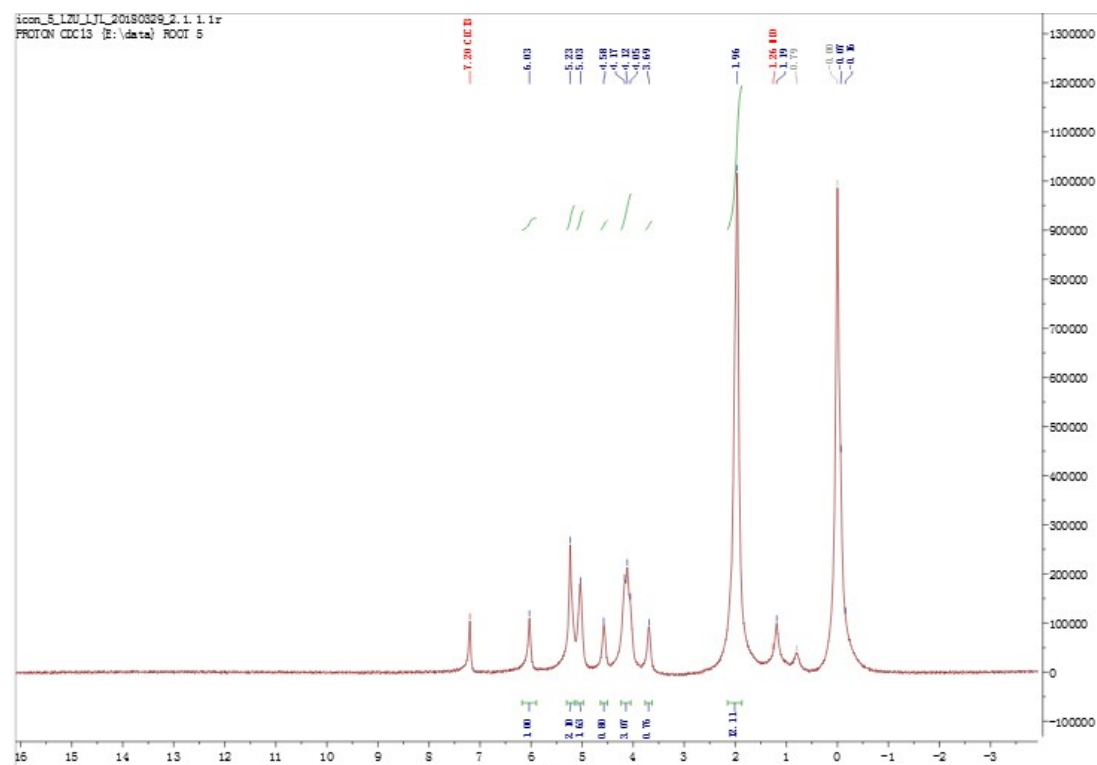

The  $^{13}\text{C}$ NMR of complex Ac-1.

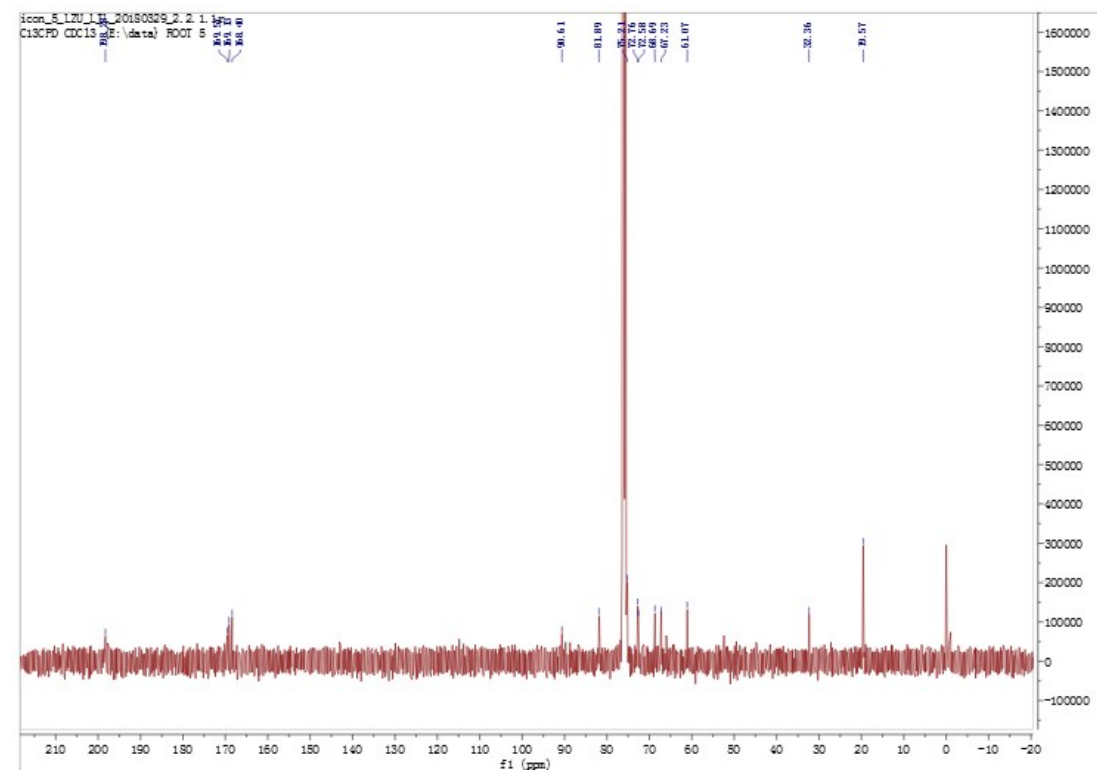

## The ESI-HRMS of complex 2

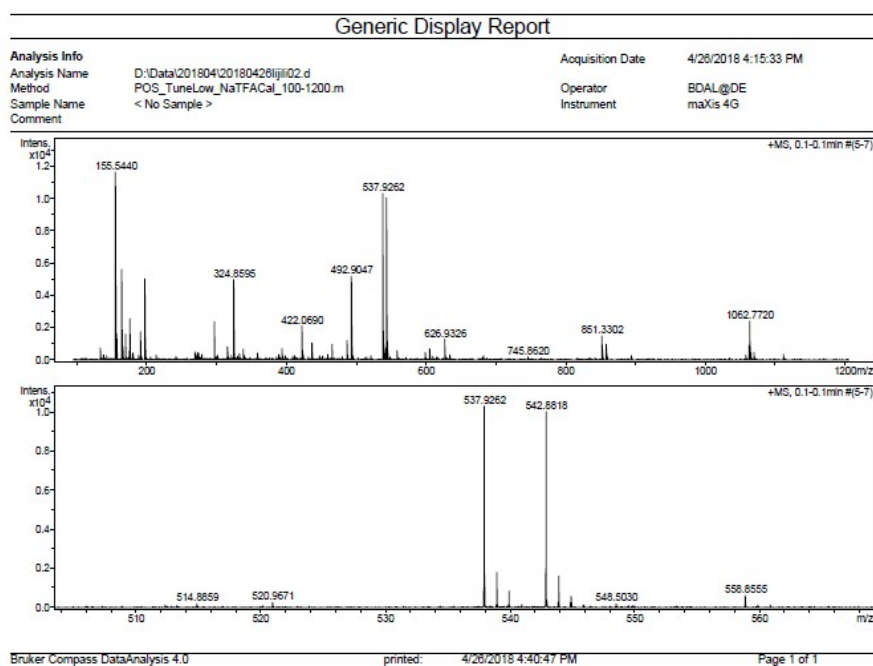

## The <sup>1</sup>H-NMR of complex 2.

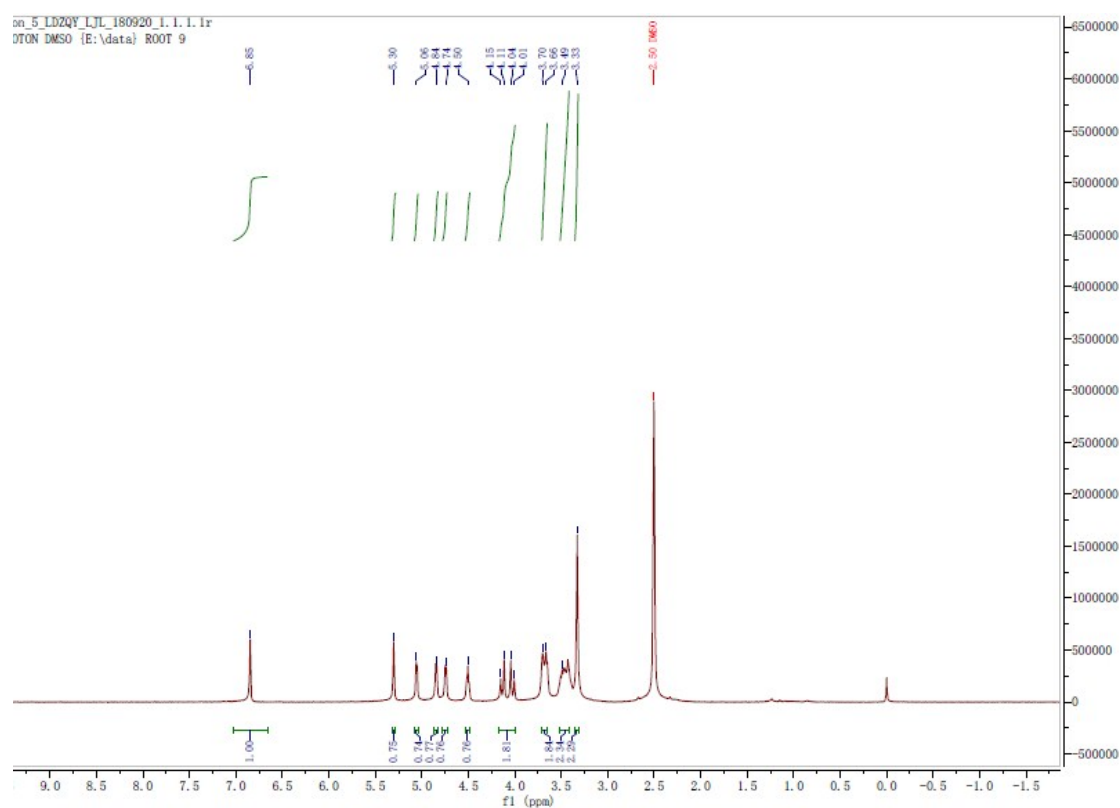

## The $^{13}\text{C}$ NMR of complex 2

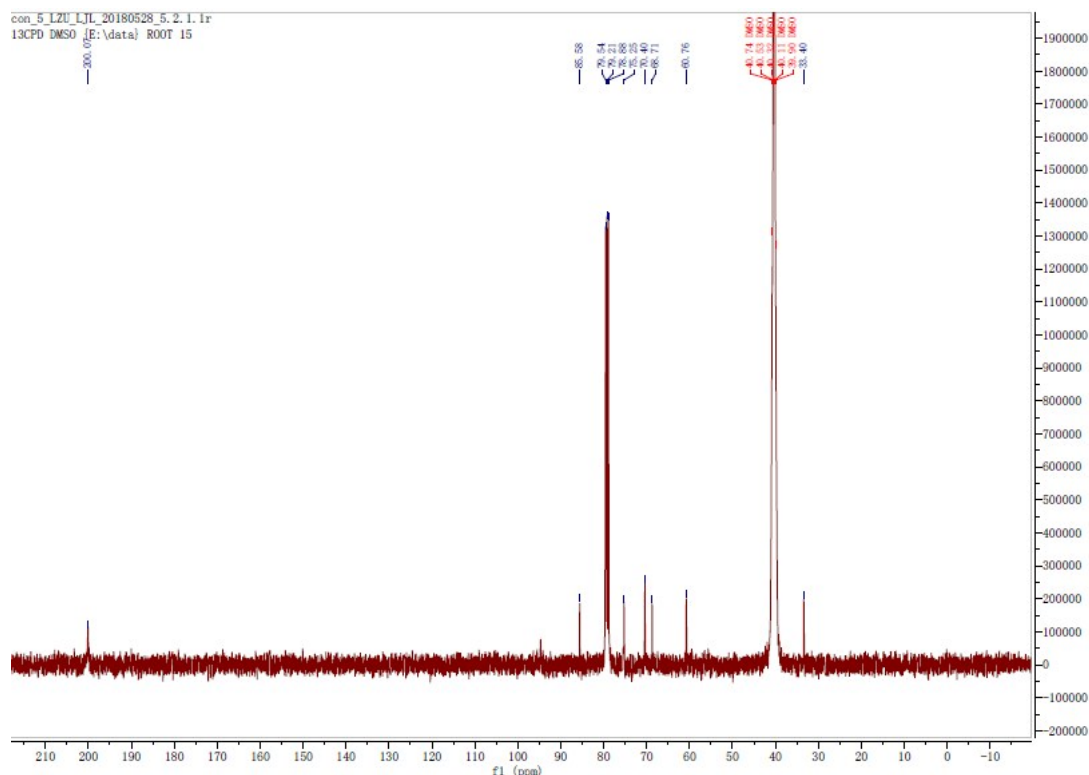

## The ESI-HRMS of complex Ac-2

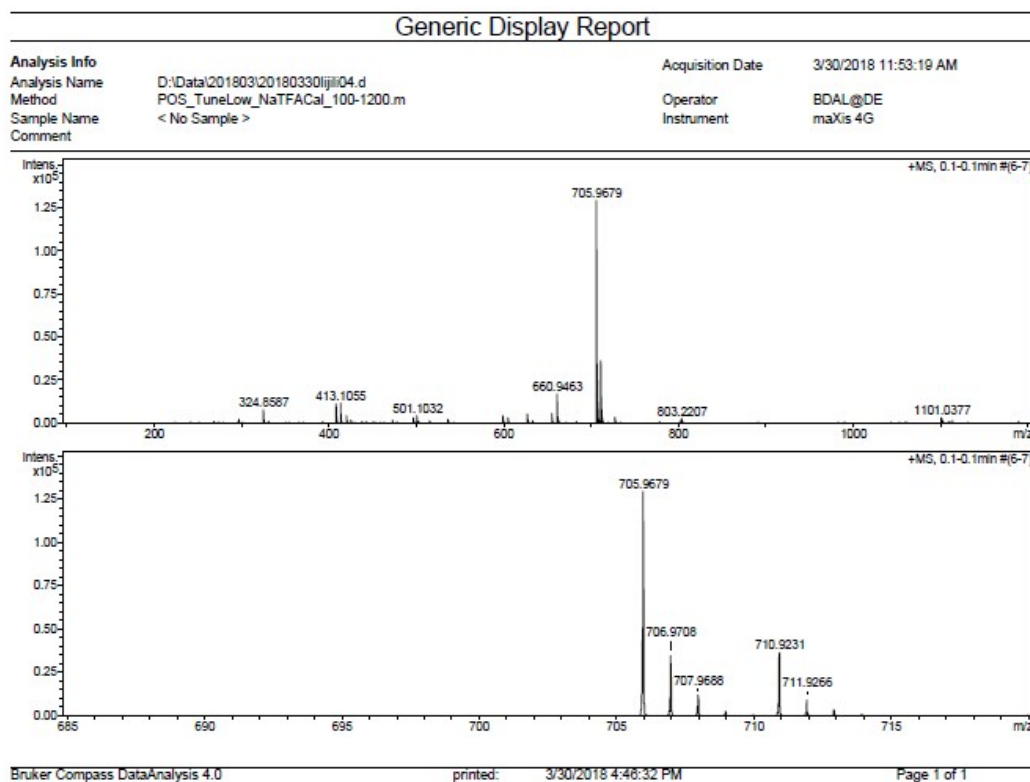

The  $^1\text{H}$ -NMR of complex Ac-2.

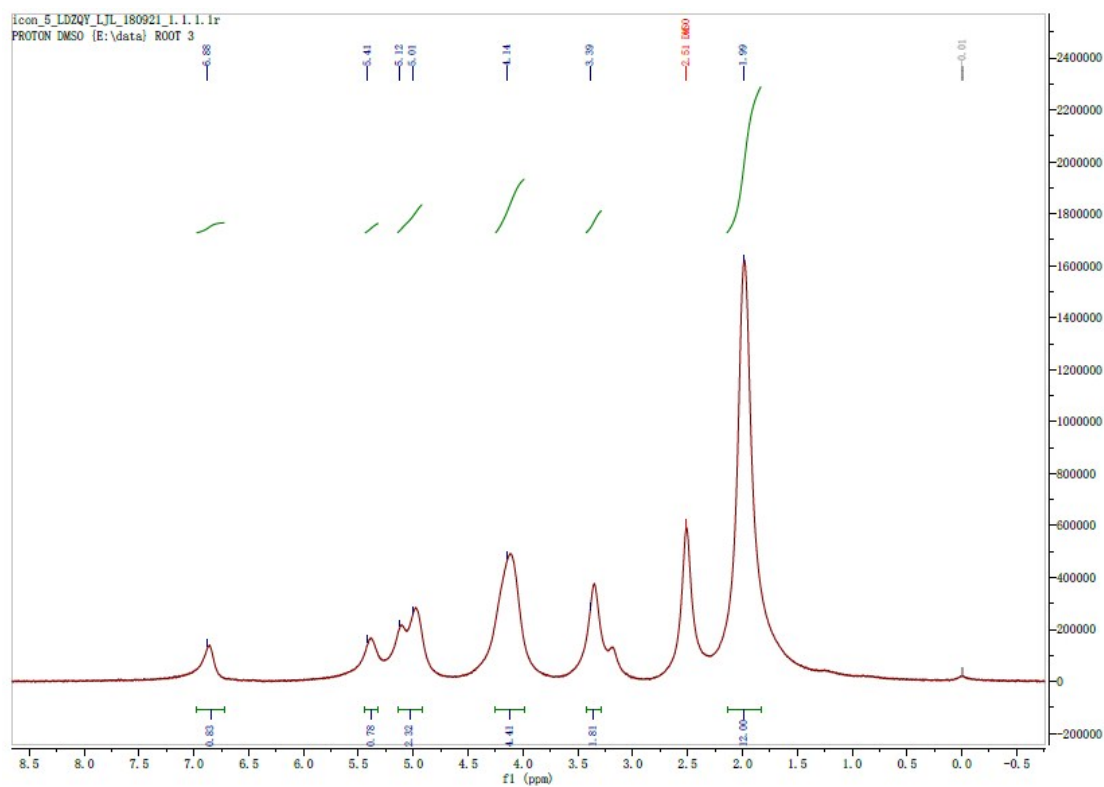

The  $^{13}\text{C}$ NMR of complex Ac-2

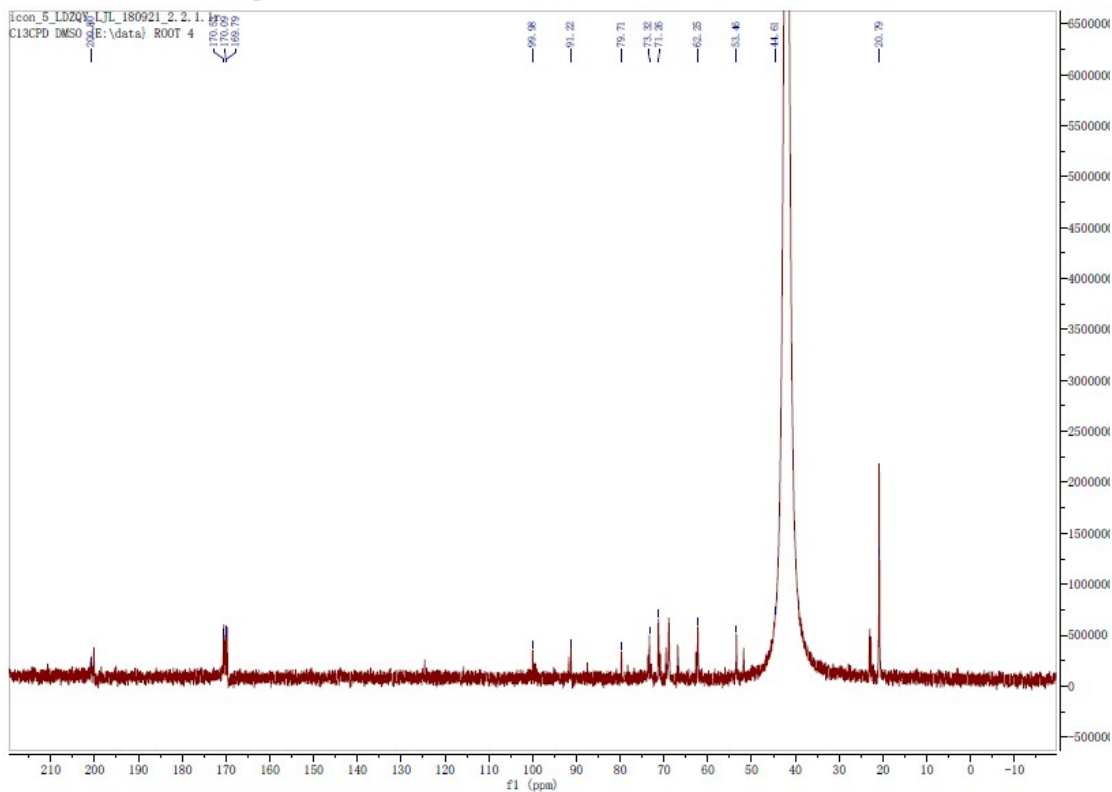

## The ESI-HRMS of complex 3

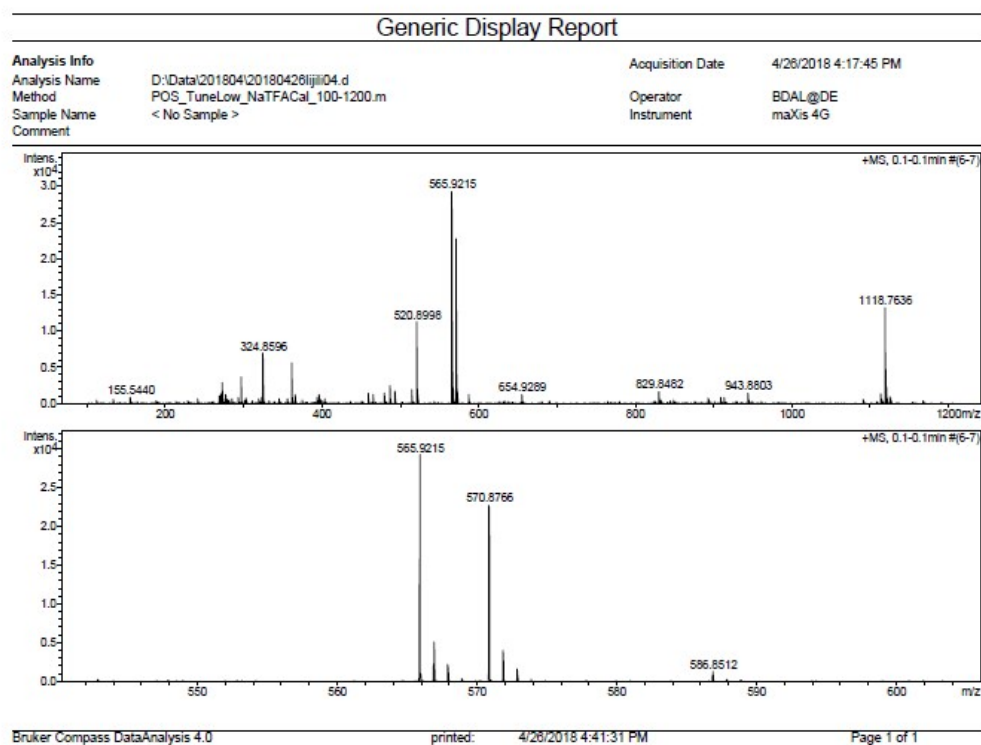

## The <sup>1</sup>H-NMR of complex 3

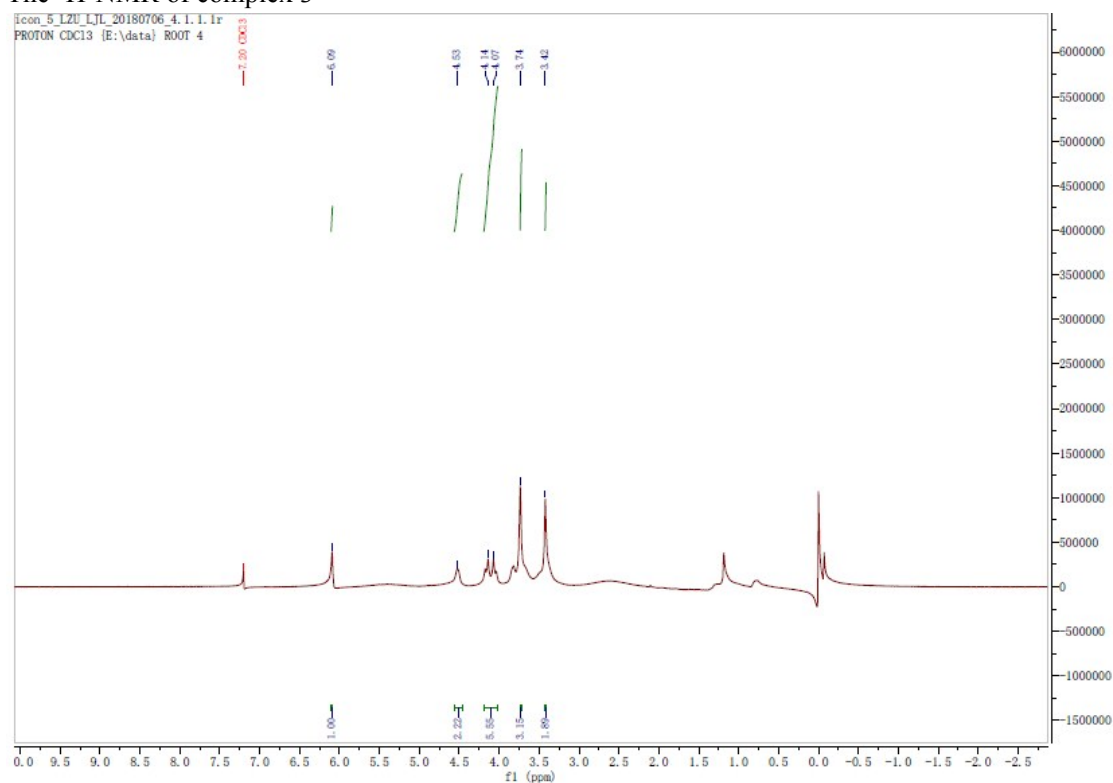



The  $^{13}\text{C}$ -NMR of complex 3

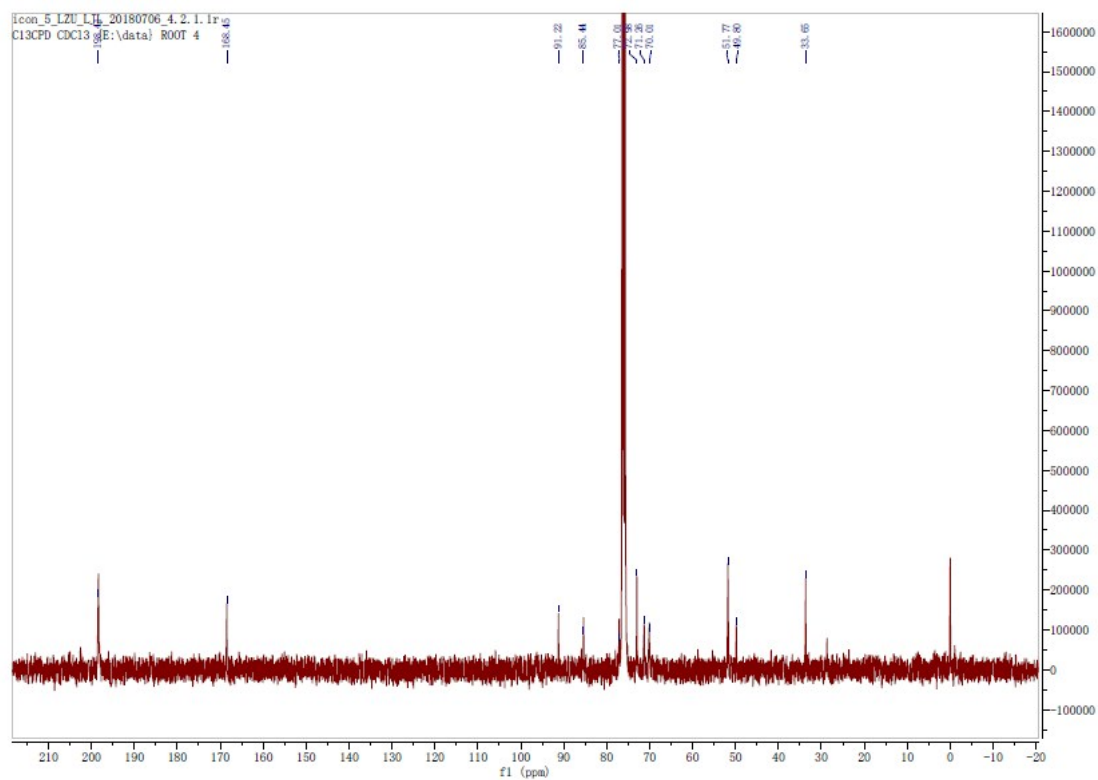

The  $^1\text{H}$ -NMR of complex Ac- 3

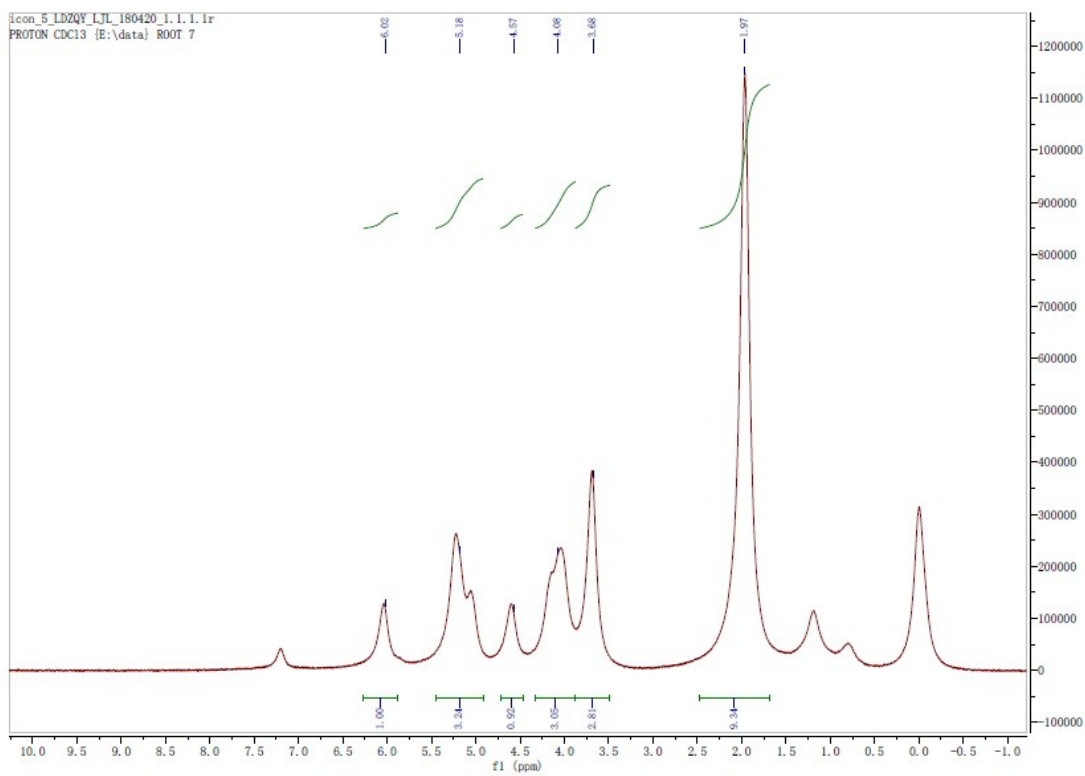

## The $^{13}\text{C}$ NMR of complex Ac-3

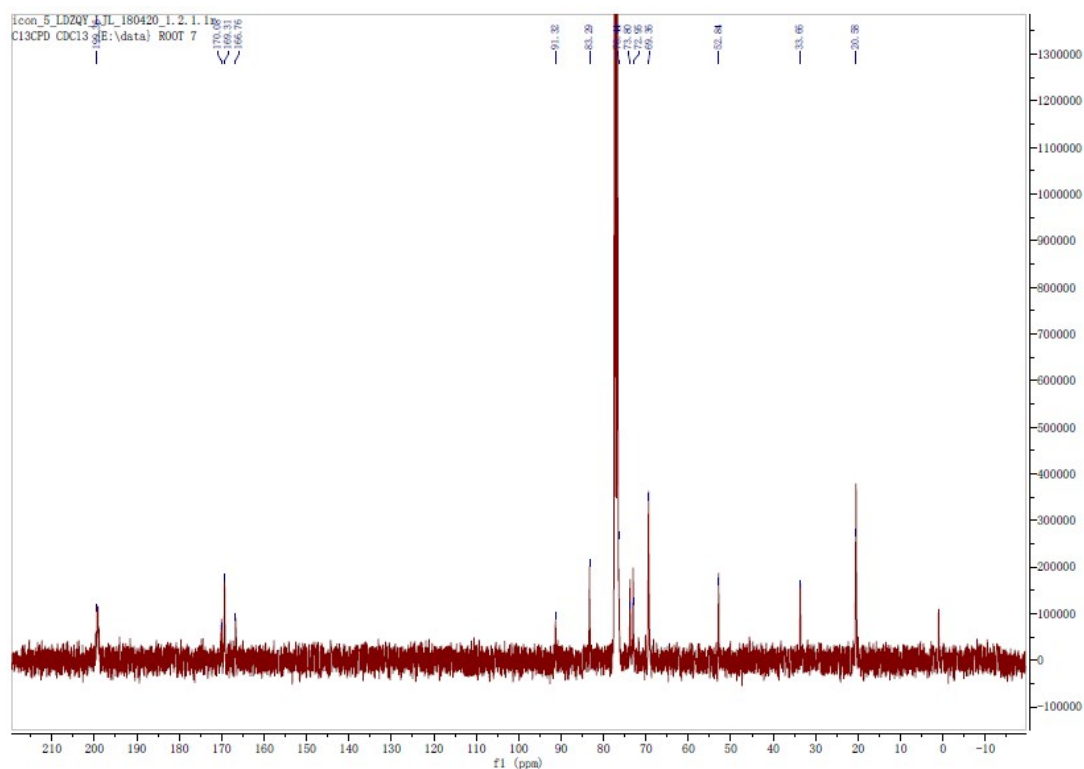

## The ESI-HRMS of complex 4

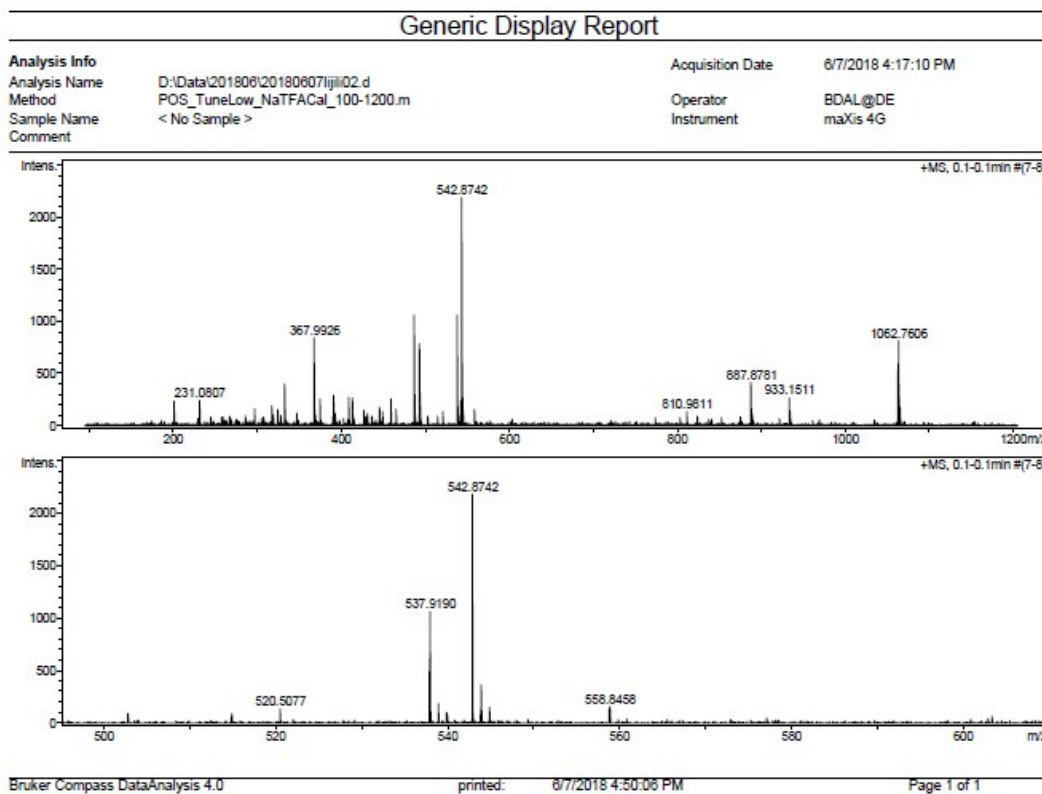

The  $^1\text{H}$ -NMR of complex 4

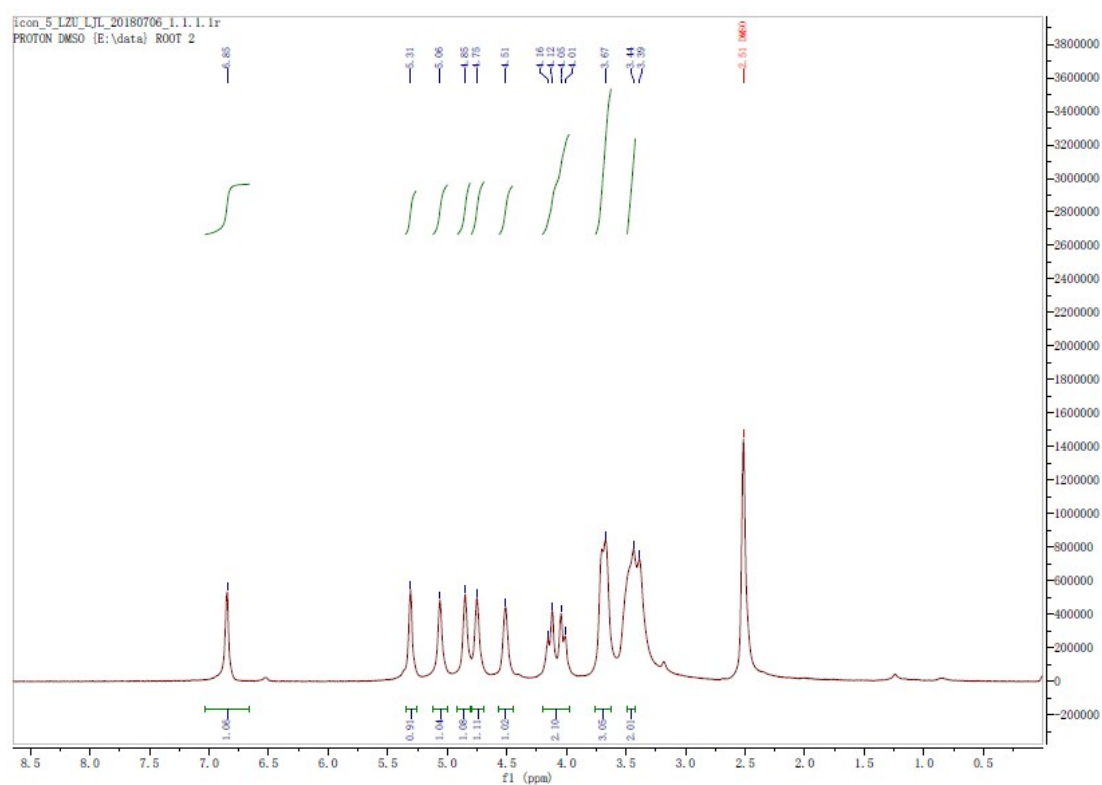

The  $^{13}\text{C}$ NMR of complex 4

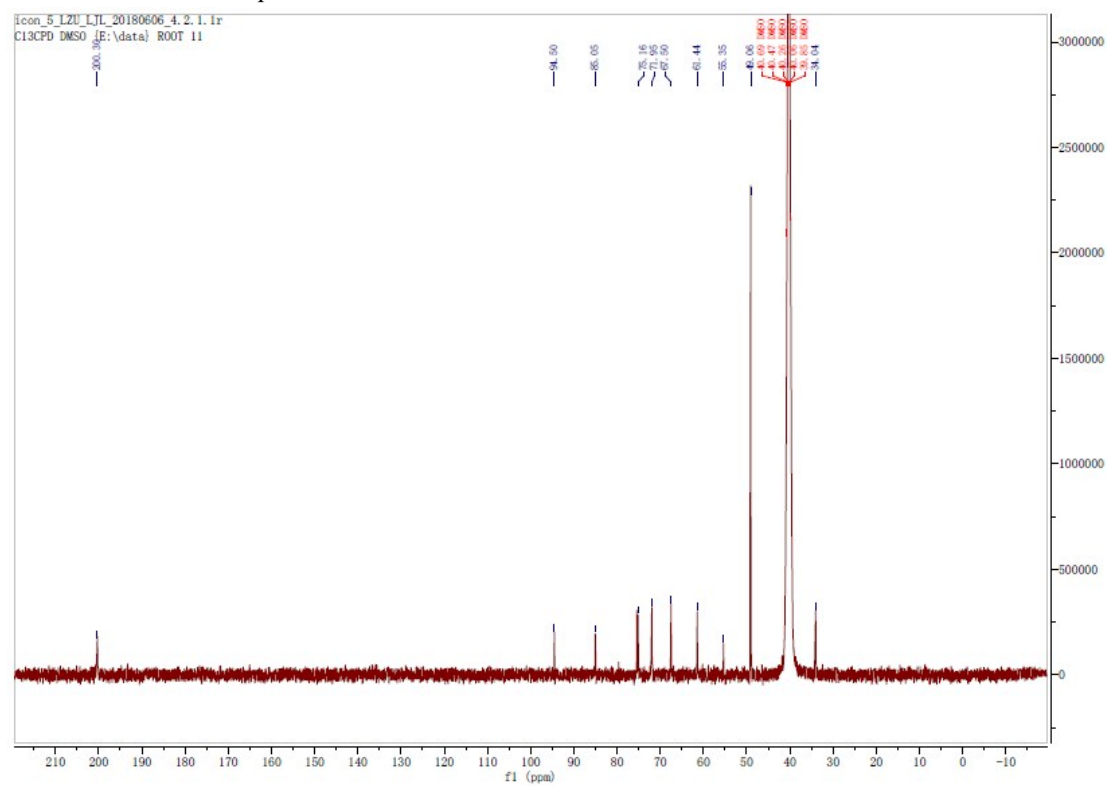

## The ESI-HRMS of complex Ac-4

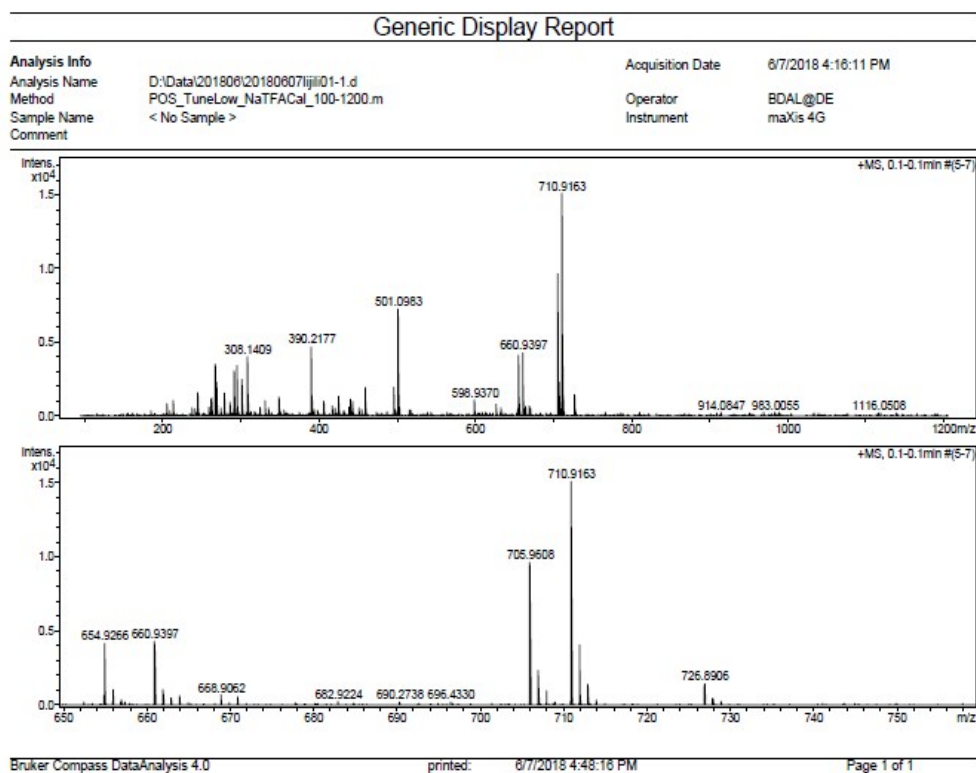

## The <sup>1</sup>H-NMR of complex Ac- 4

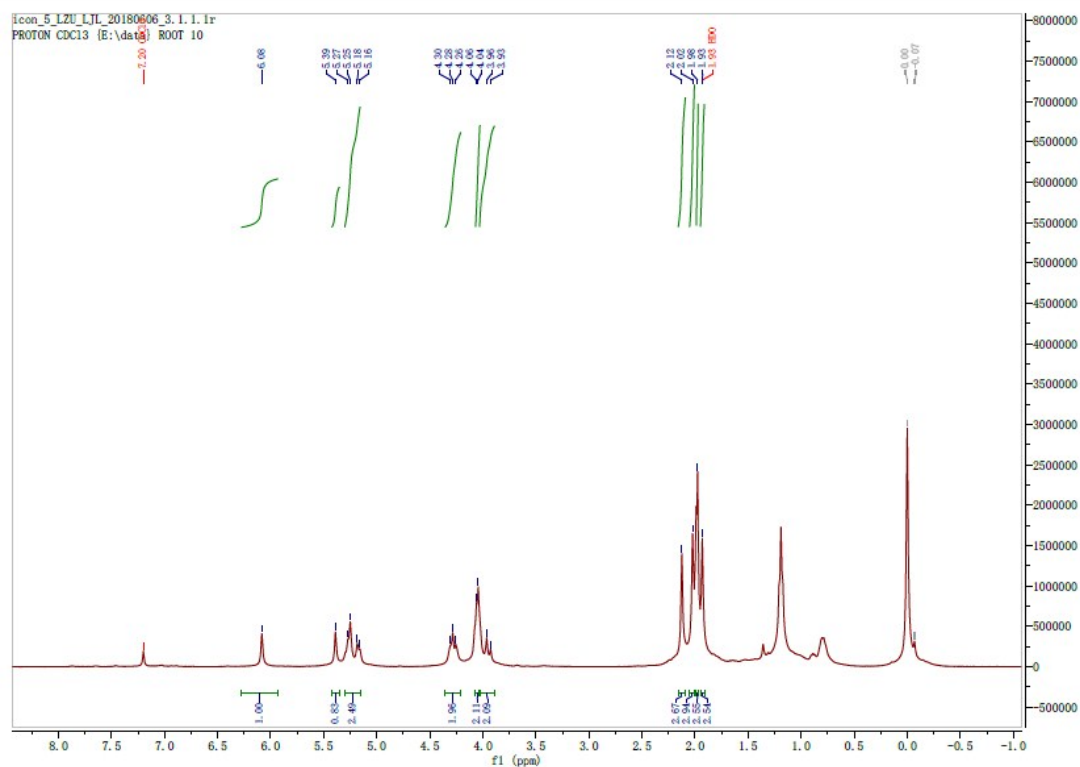

# The $^{13}\text{C}$ NMR of complex Ac-4

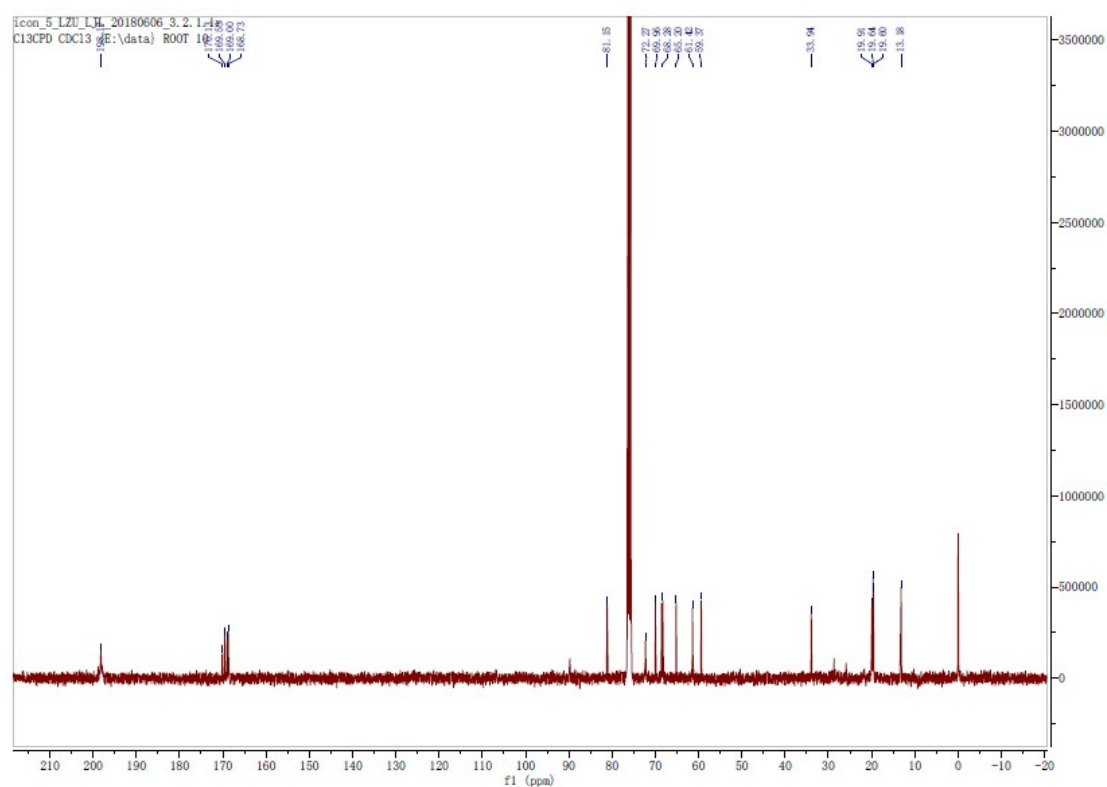

# The $^1\text{H}$ -NMR of complex 5

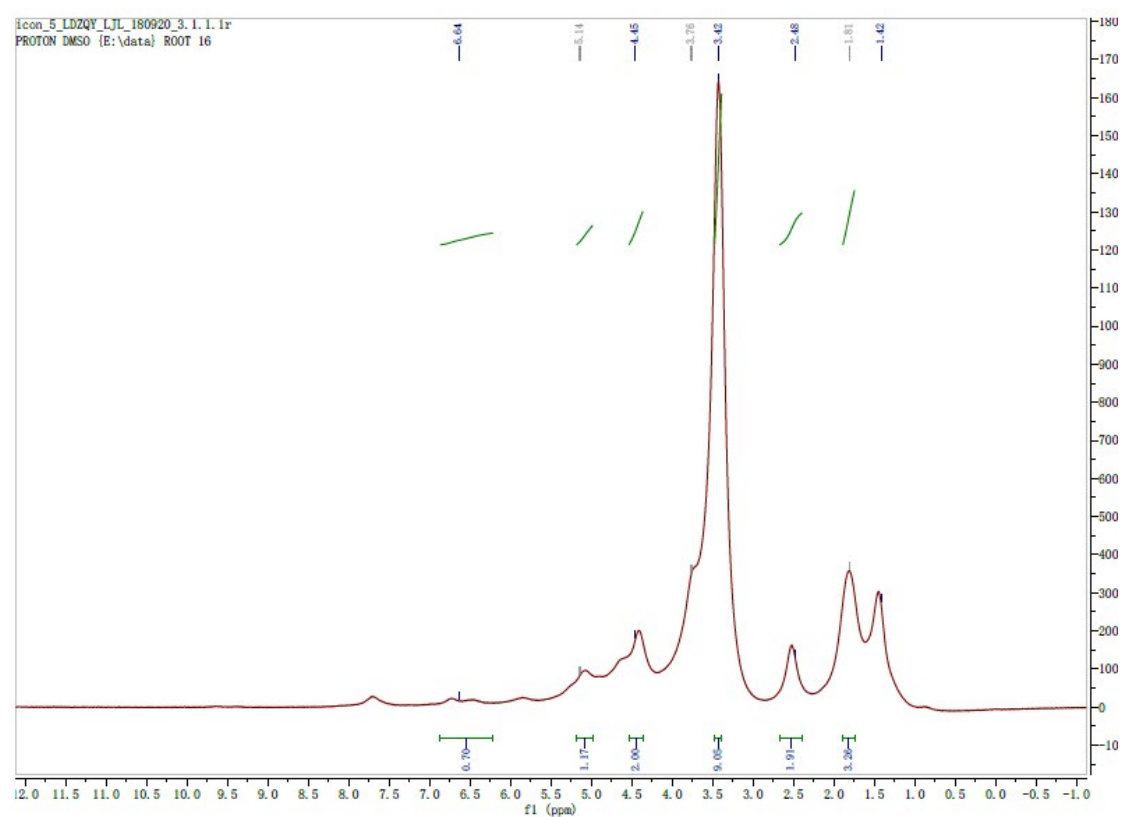

The ESI-HRMS of complex Ac-5

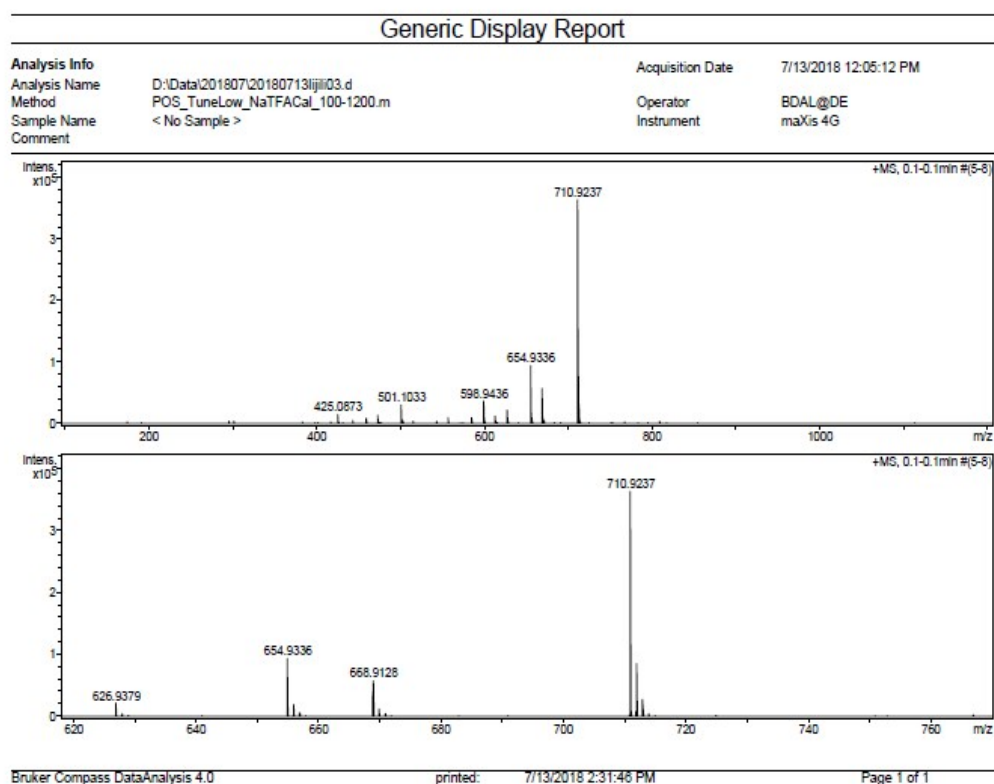

The  $^1\text{H}$ -NMR of complex Ac-5

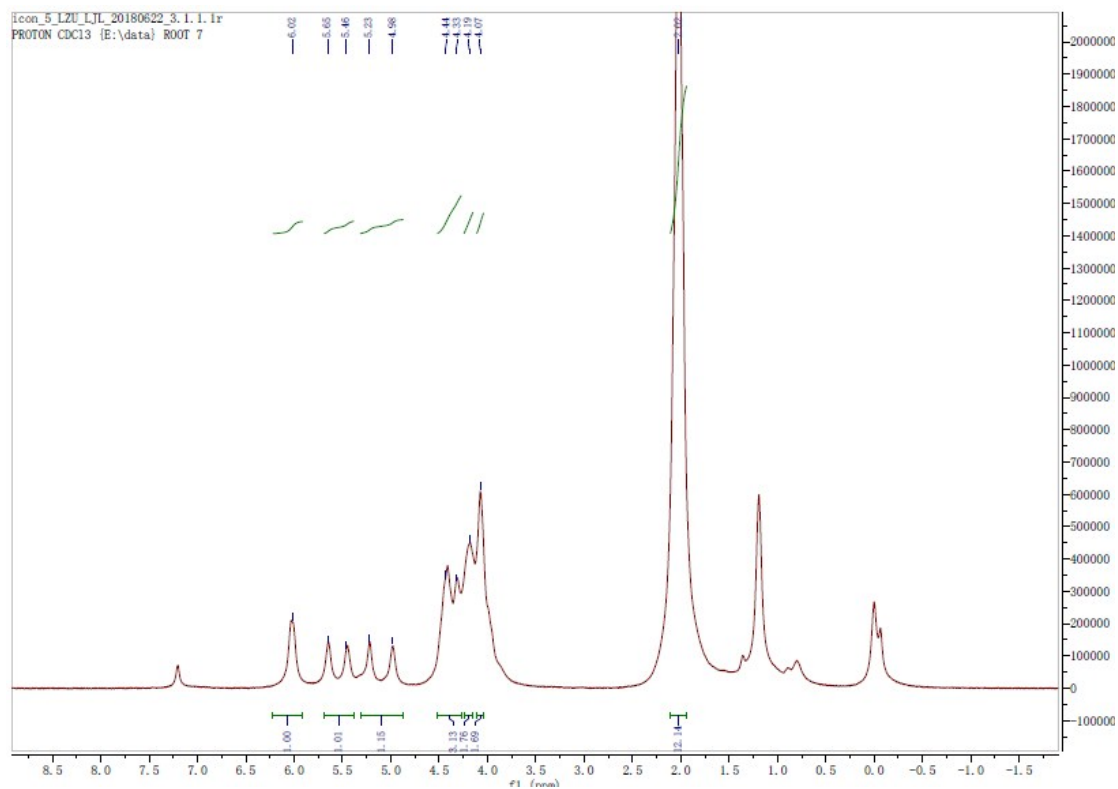



# The $^{13}\text{C}$ NMR of complex Ac-5

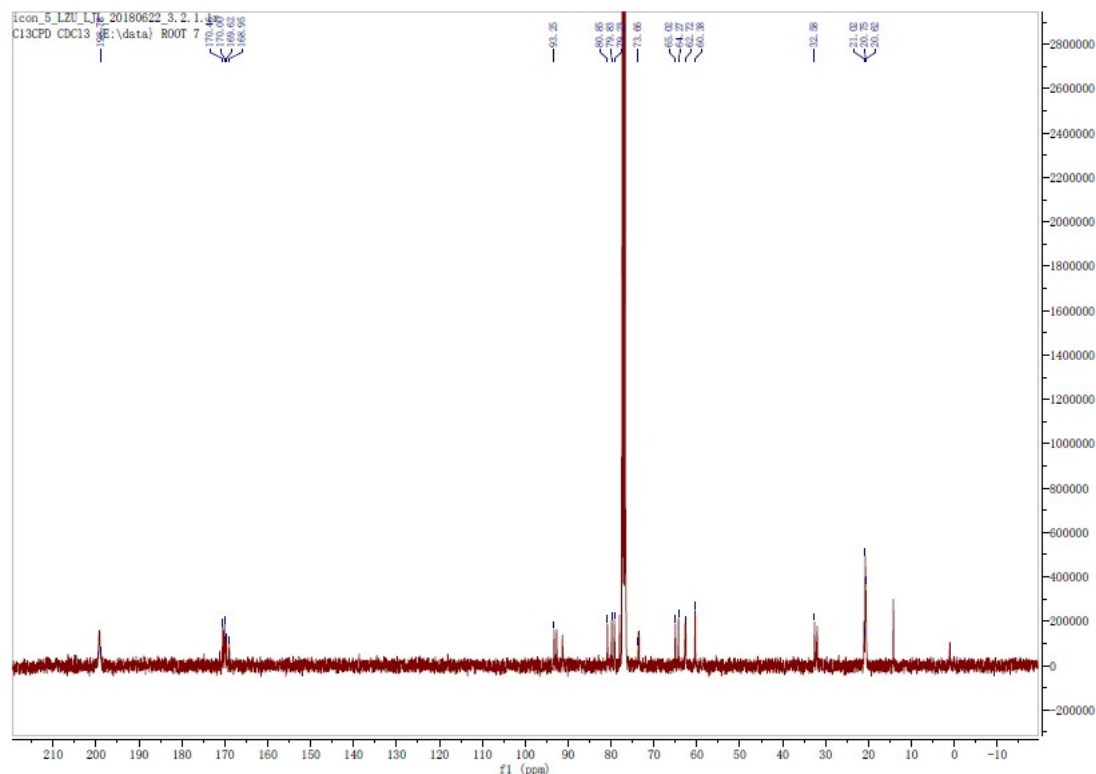

## The ESI-HRMS of complex 6

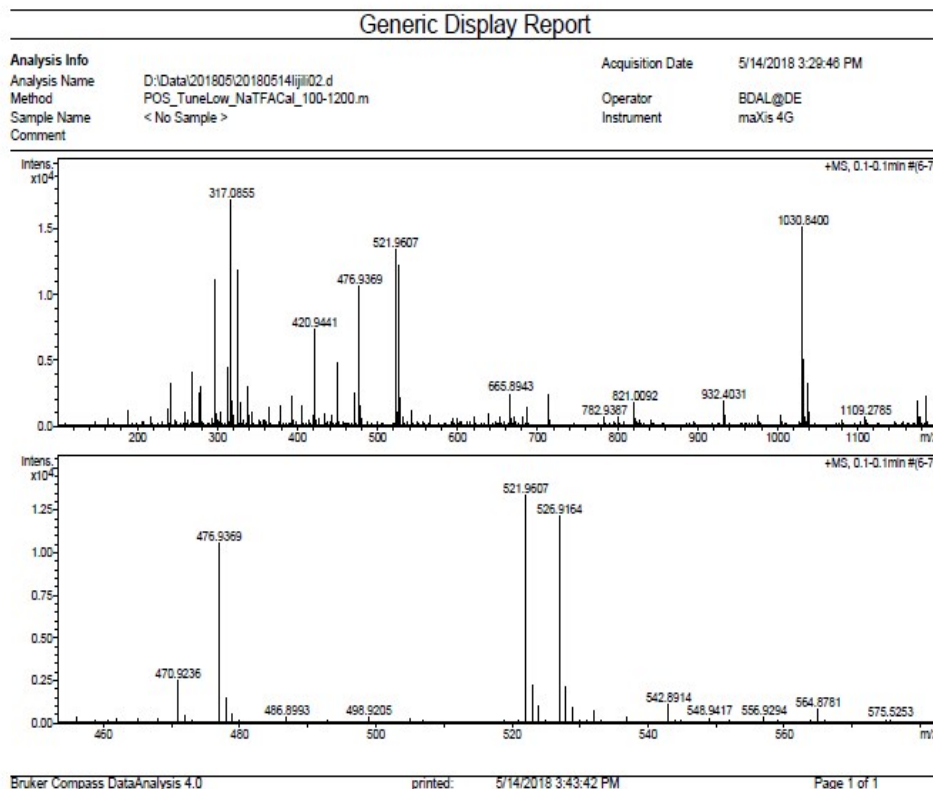

# The $^1\text{H}$ -NMR of complex 6

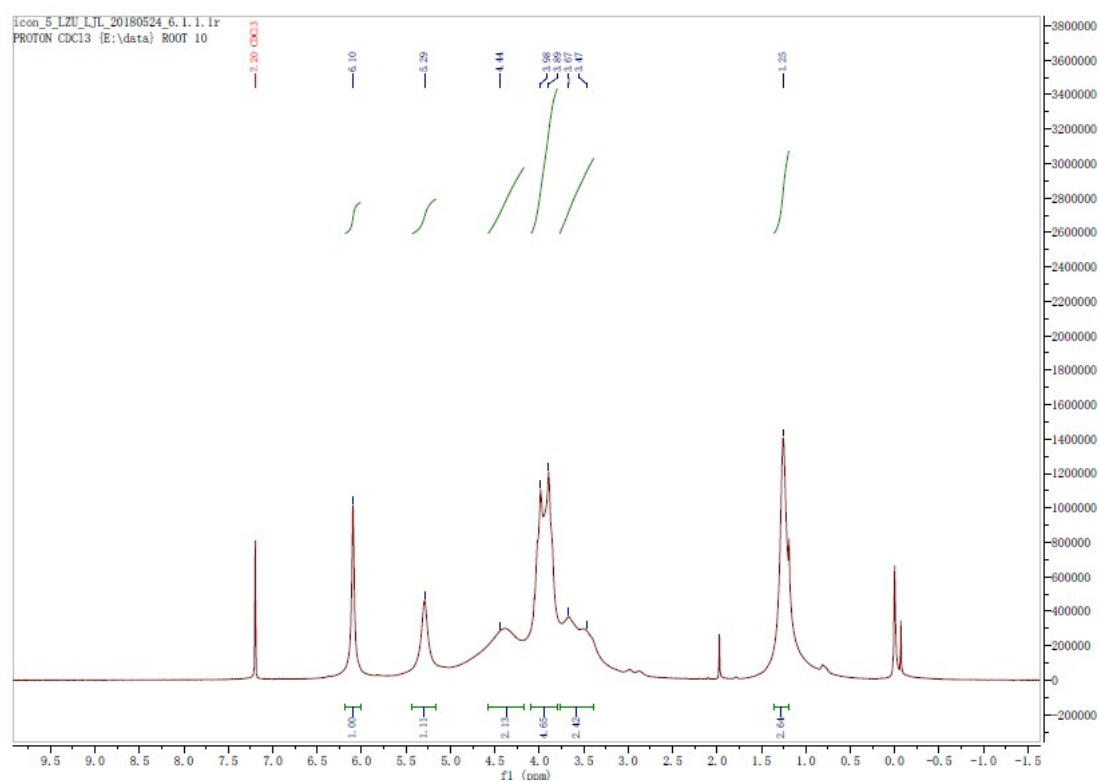

# The $^{13}\text{C}$ NMR of complex 6

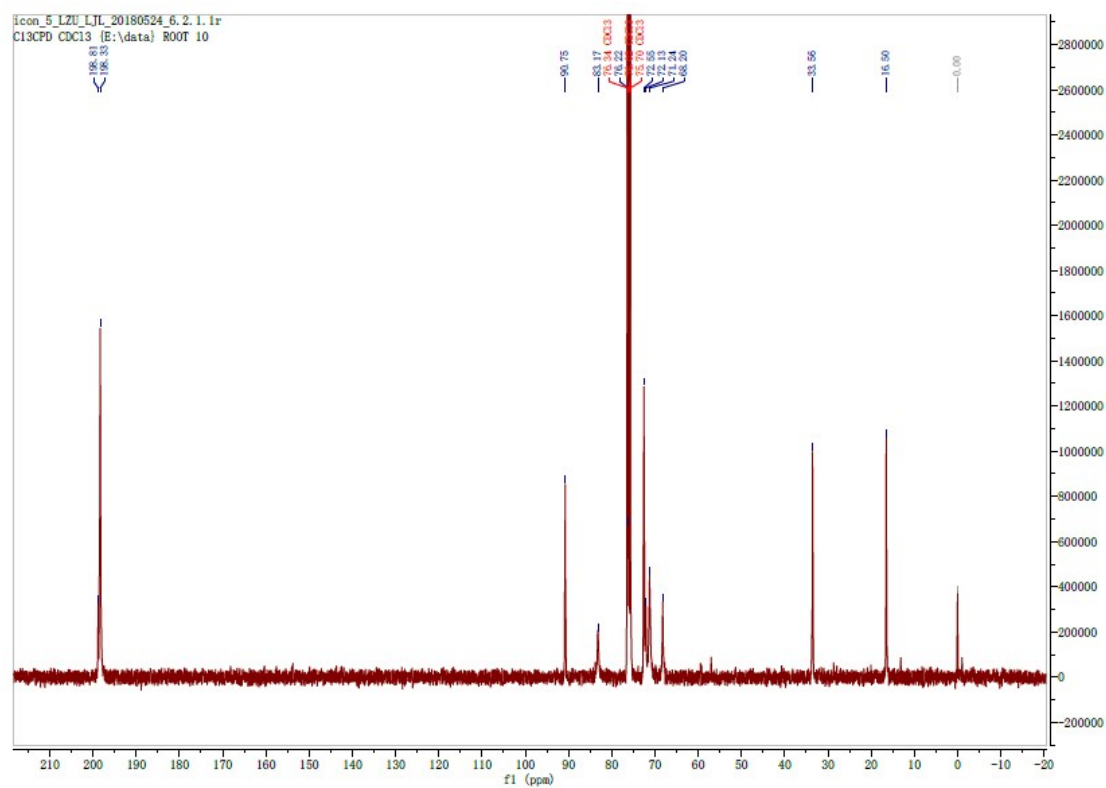

The ESI-HRMS of complex Ac-6

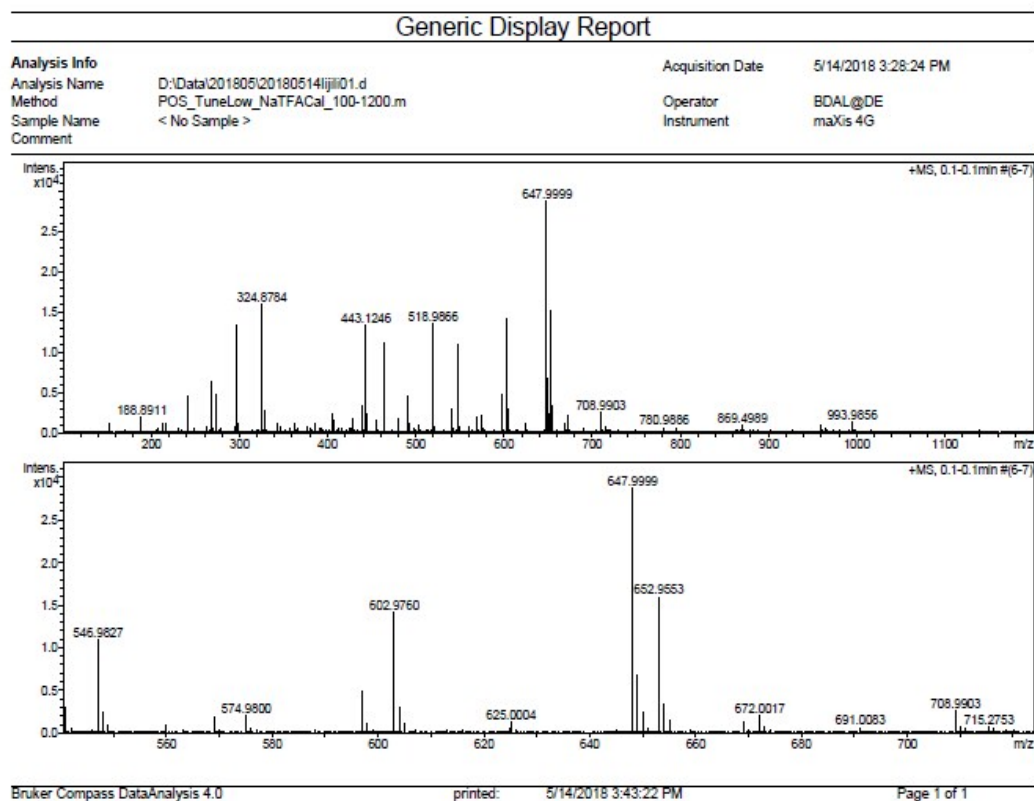

The  $^1\text{H}$ -NMR of complex Ac-6

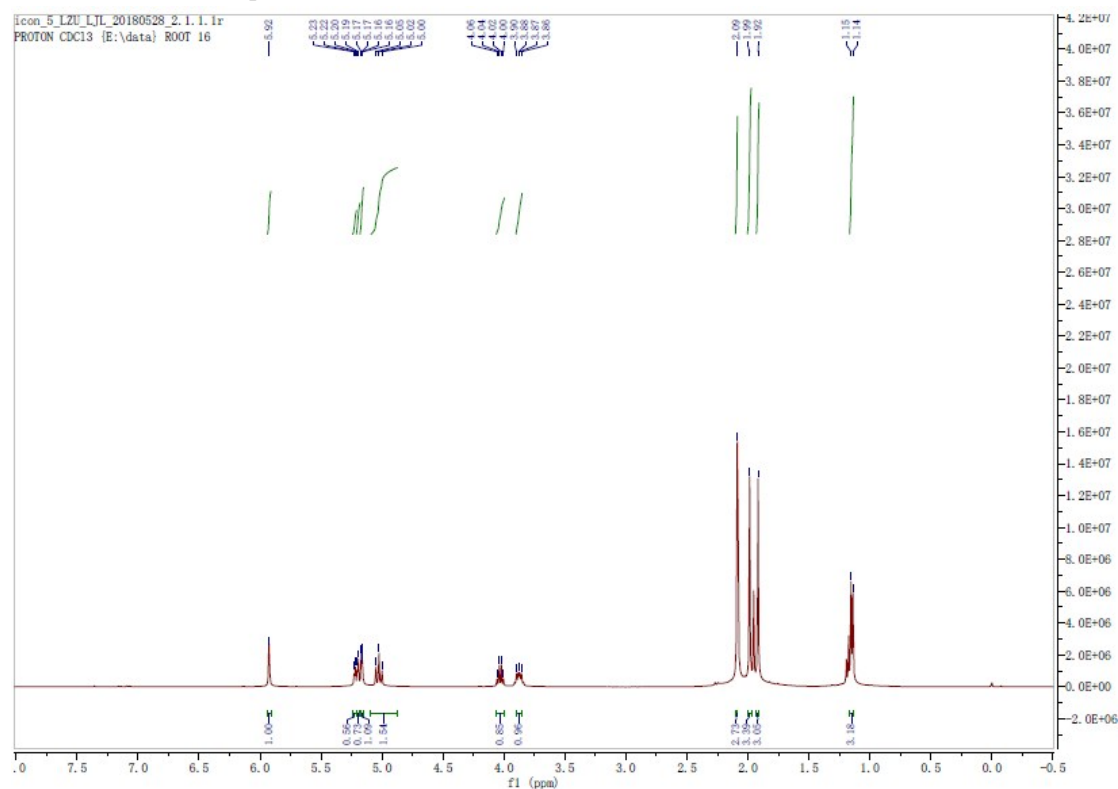

## The ESI-HRMS of complex 7

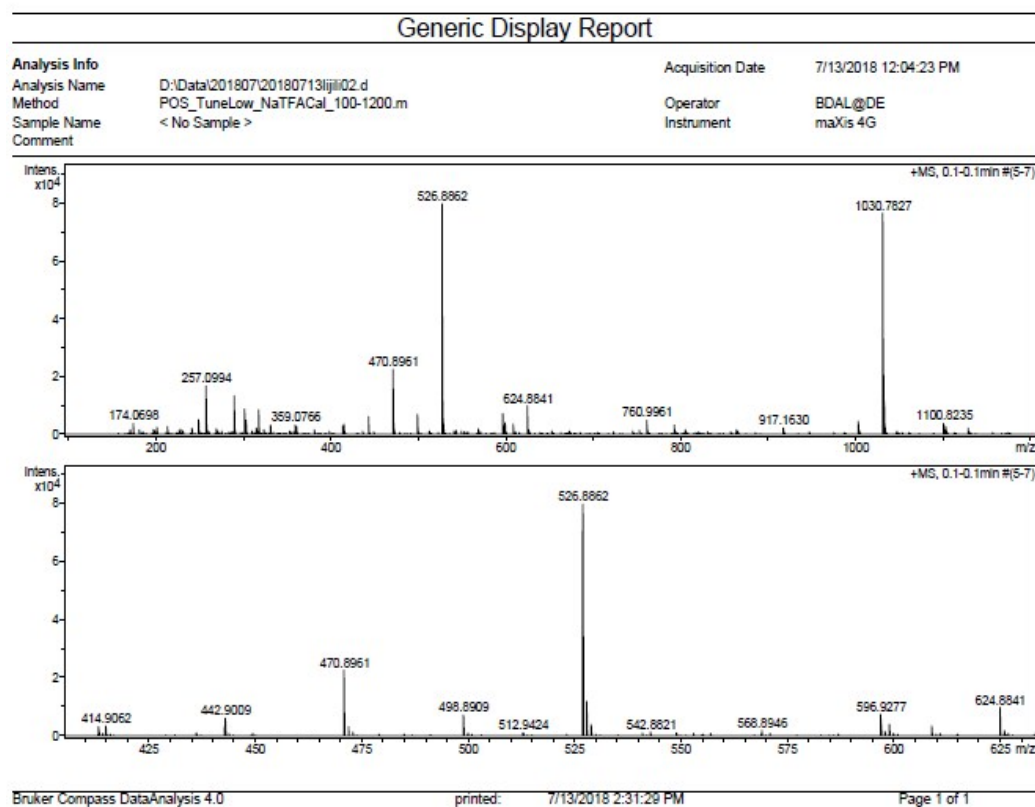

## The <sup>1</sup>H-NMR of complex 7

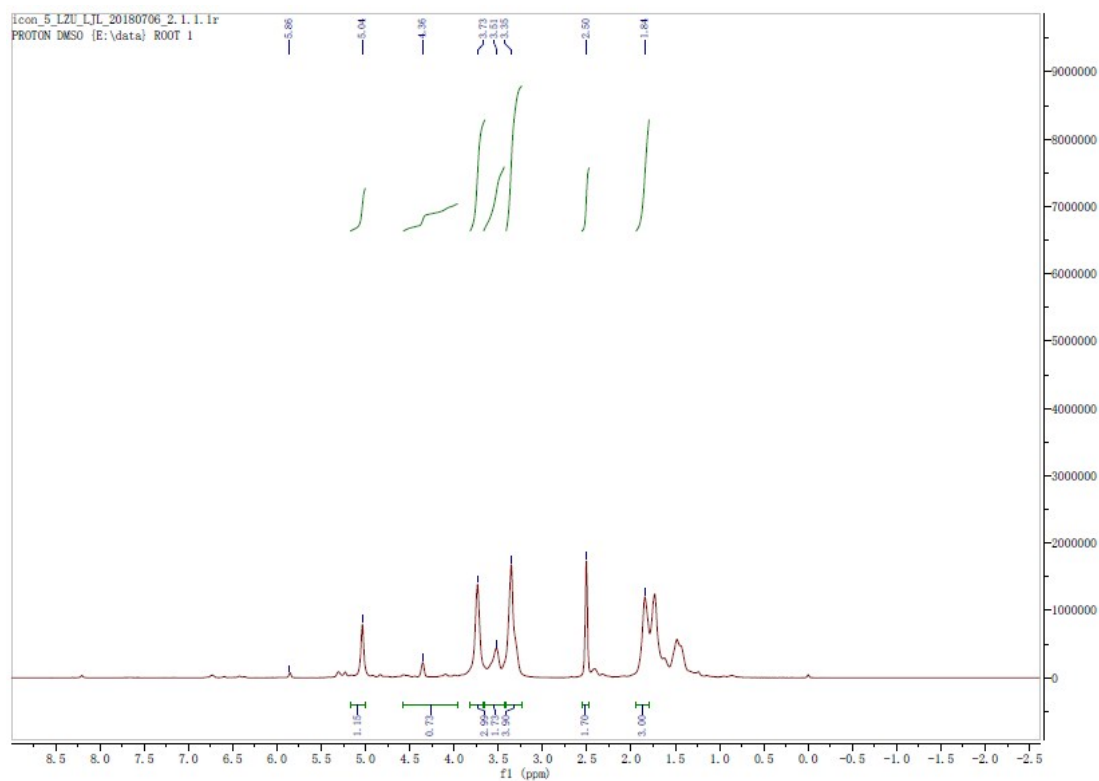

## The ESI-HRMS of complex Ac-7

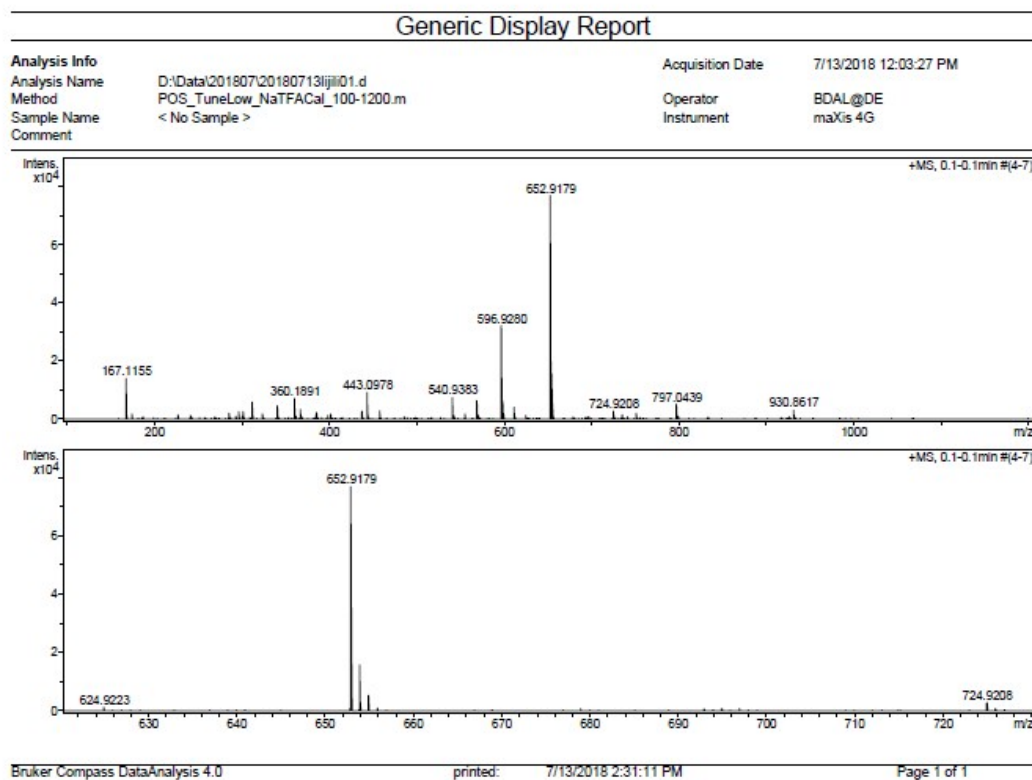

## The <sup>1</sup>H-NMR of complex Ac-7

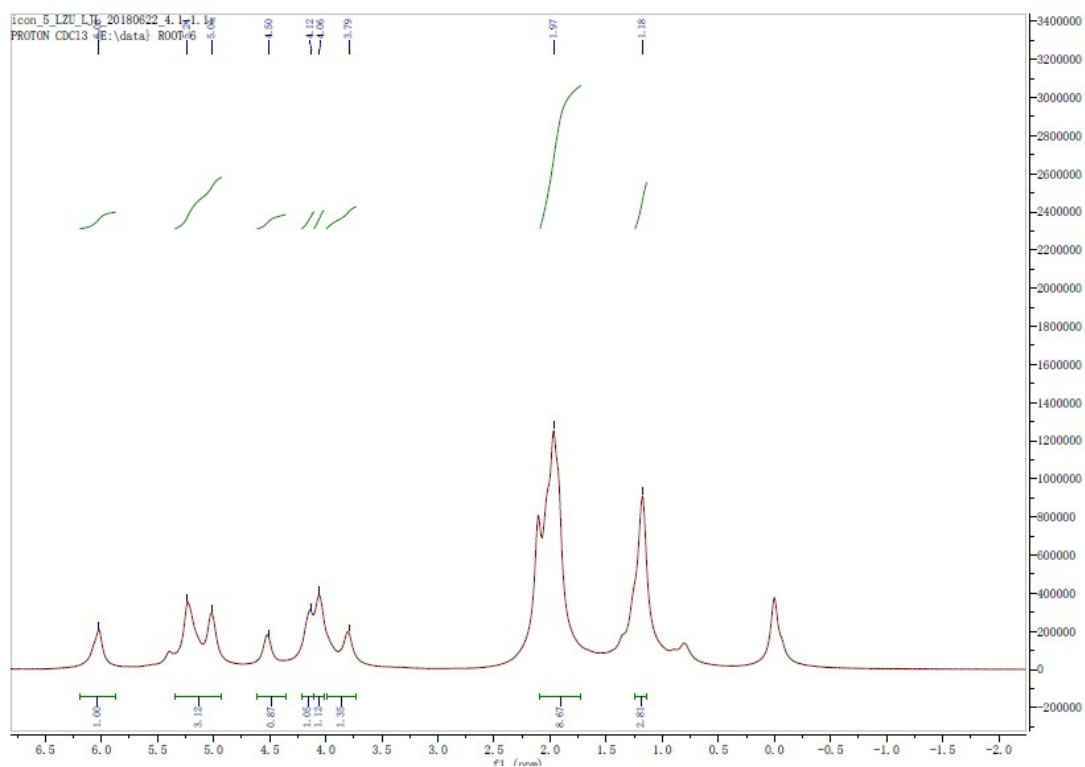

## The $^{13}\text{C}$ NMR of complex Ac-7

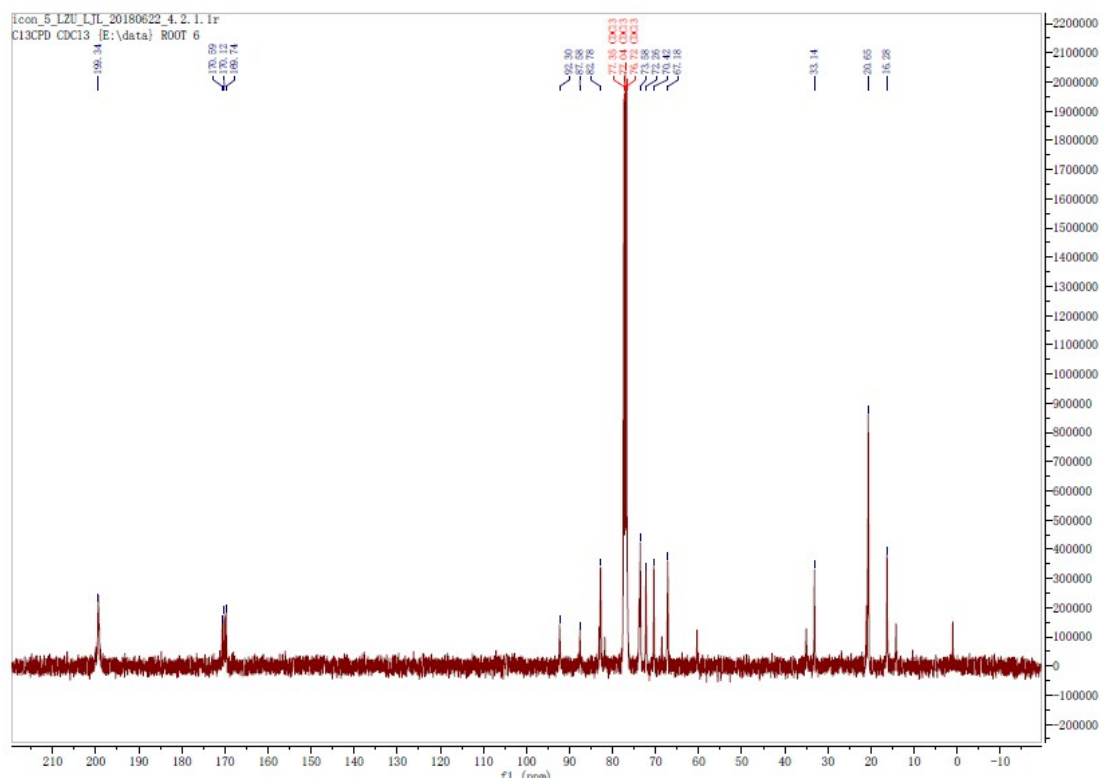

## The ESI-HRMS of complex 8

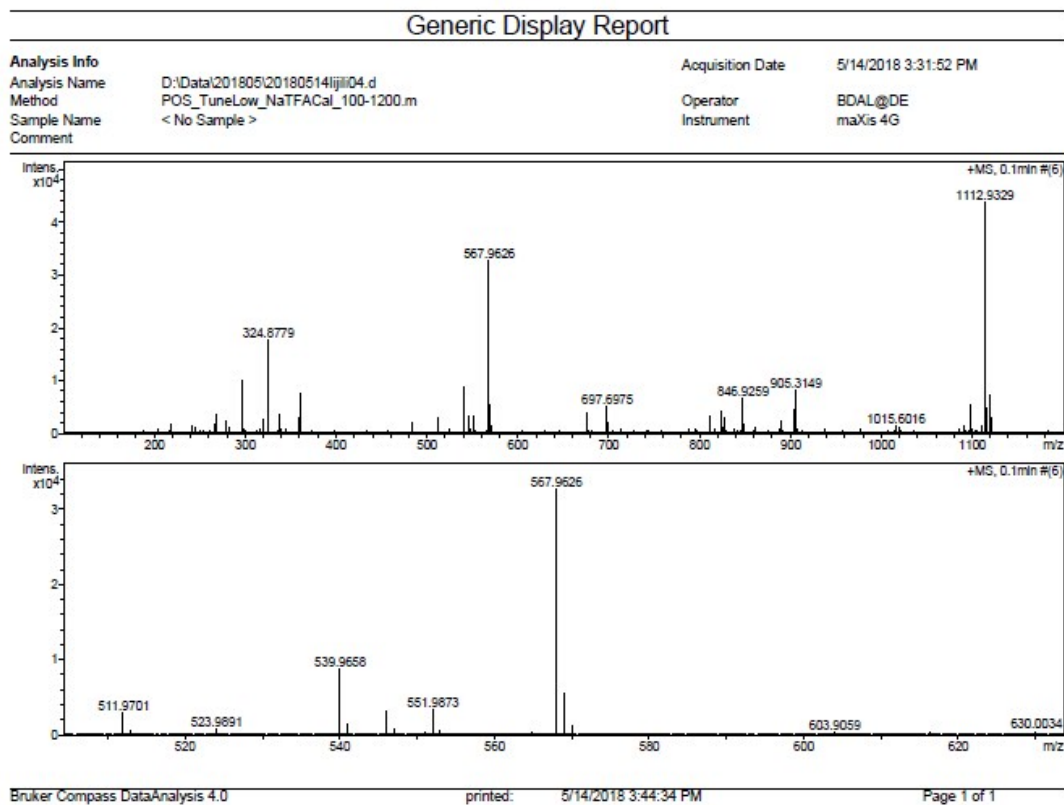



The  $^1\text{H}$ -NMR of complex 8

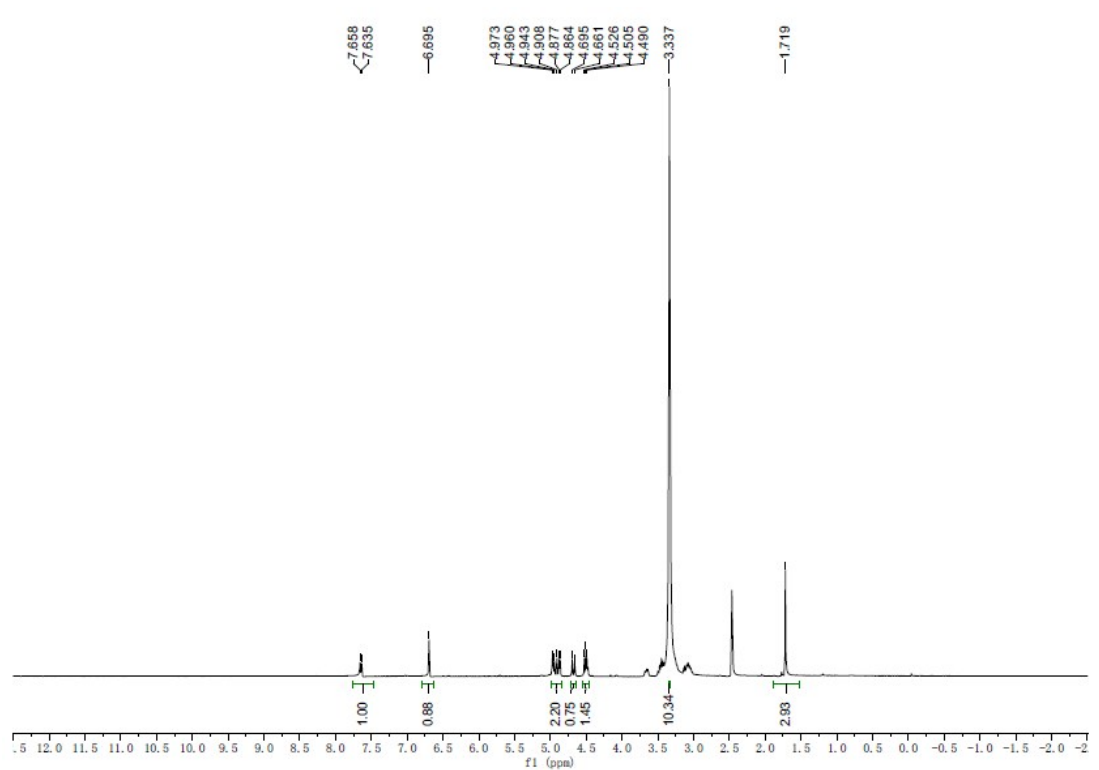

The  $^{13}\text{C}$ -NMR of complex 8

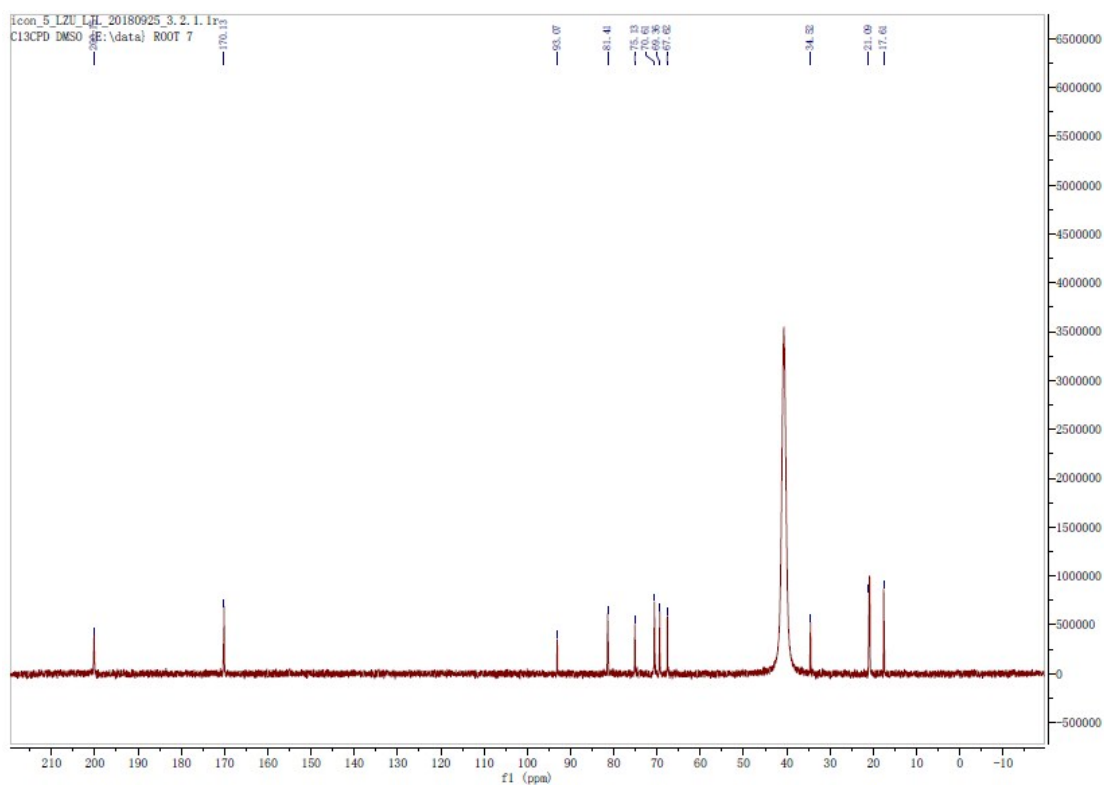

# The ESI-HRMS of complex Ac-8

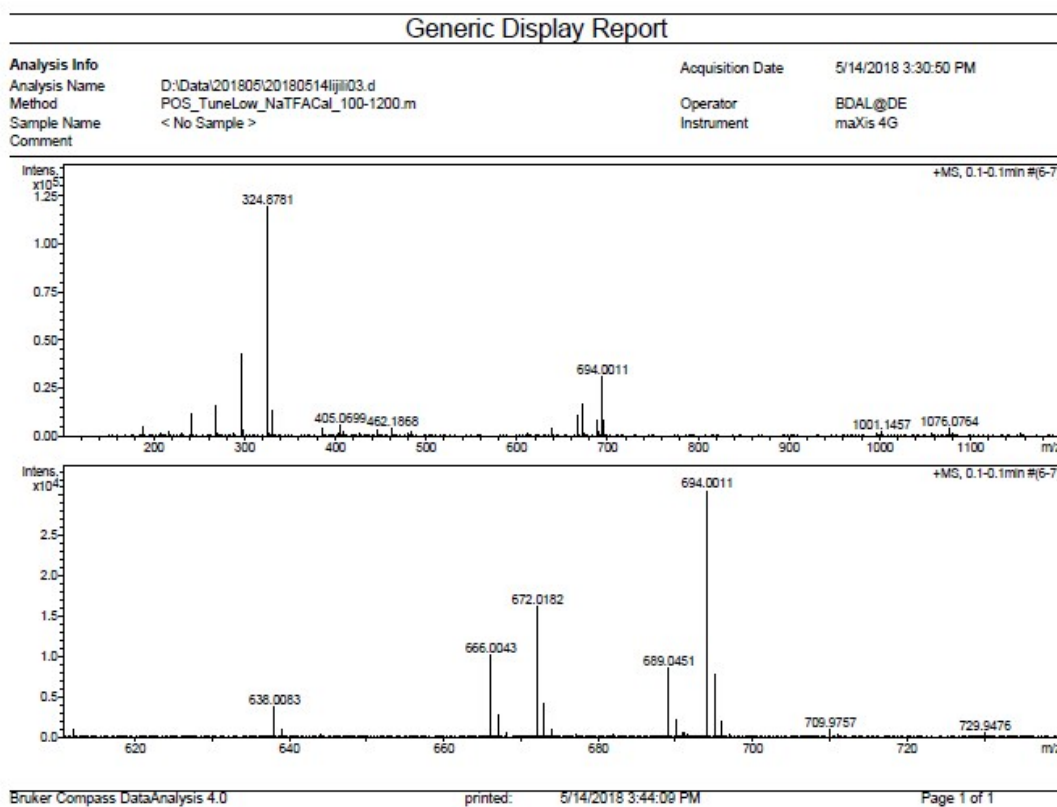

# The <sup>1</sup>H-NMR of complex Ac-8

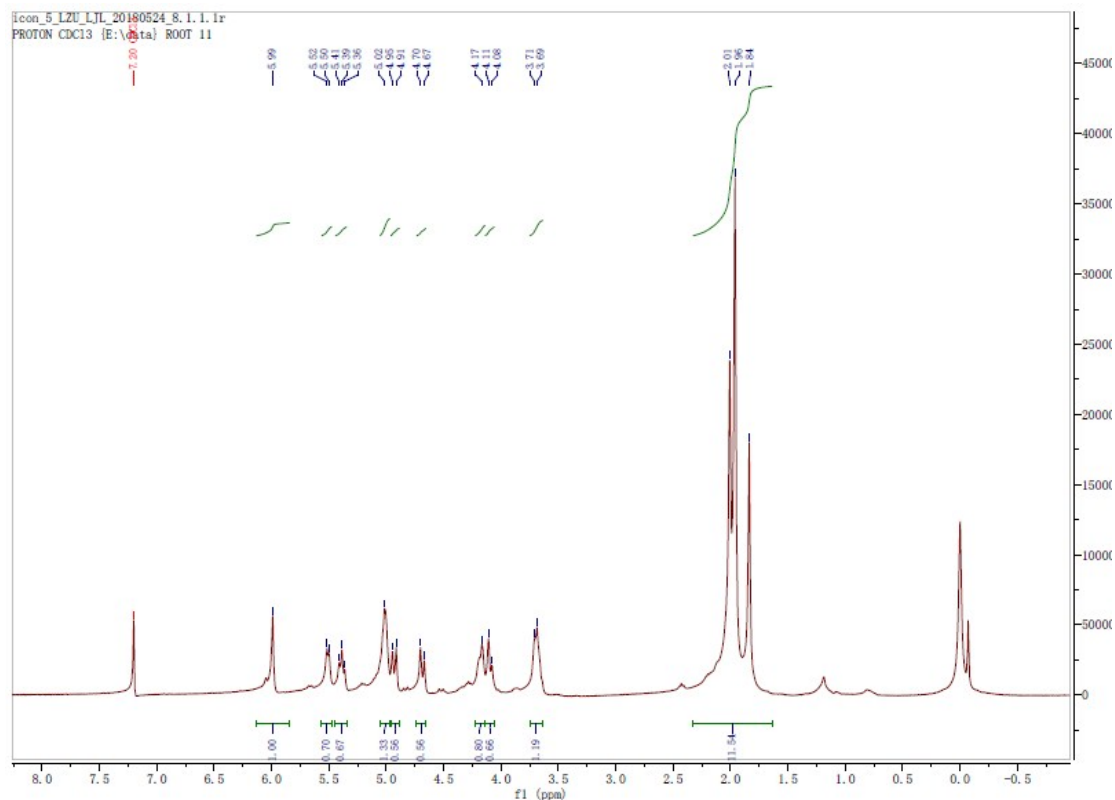

# The $^{13}\text{C}$ NMR of complex Ac-8

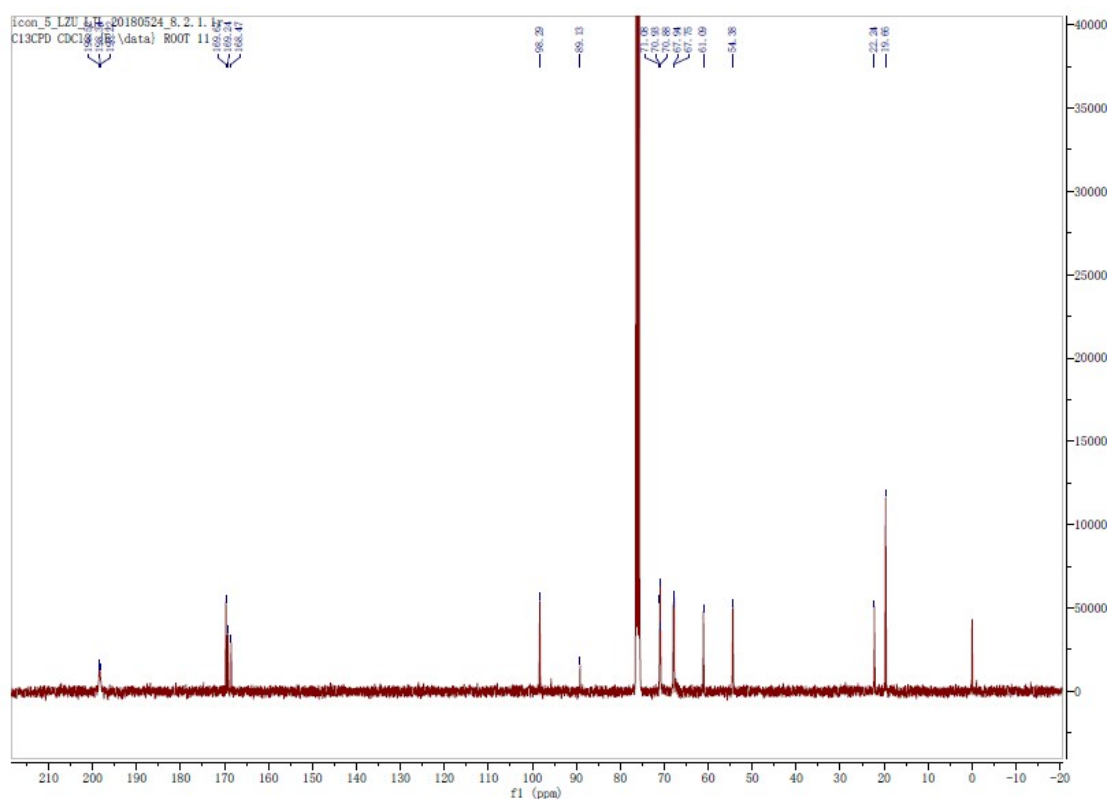

## The ESI-HRMS of complex 9

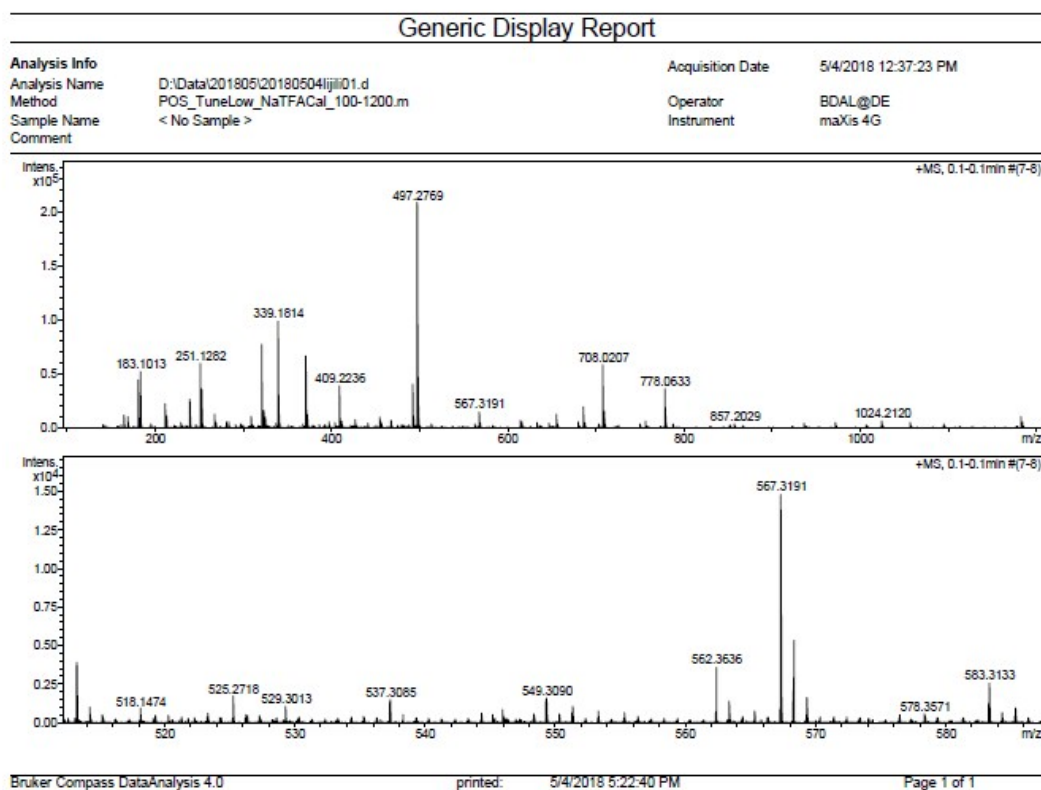

The  $^1\text{H}$ -NMR of complex 9

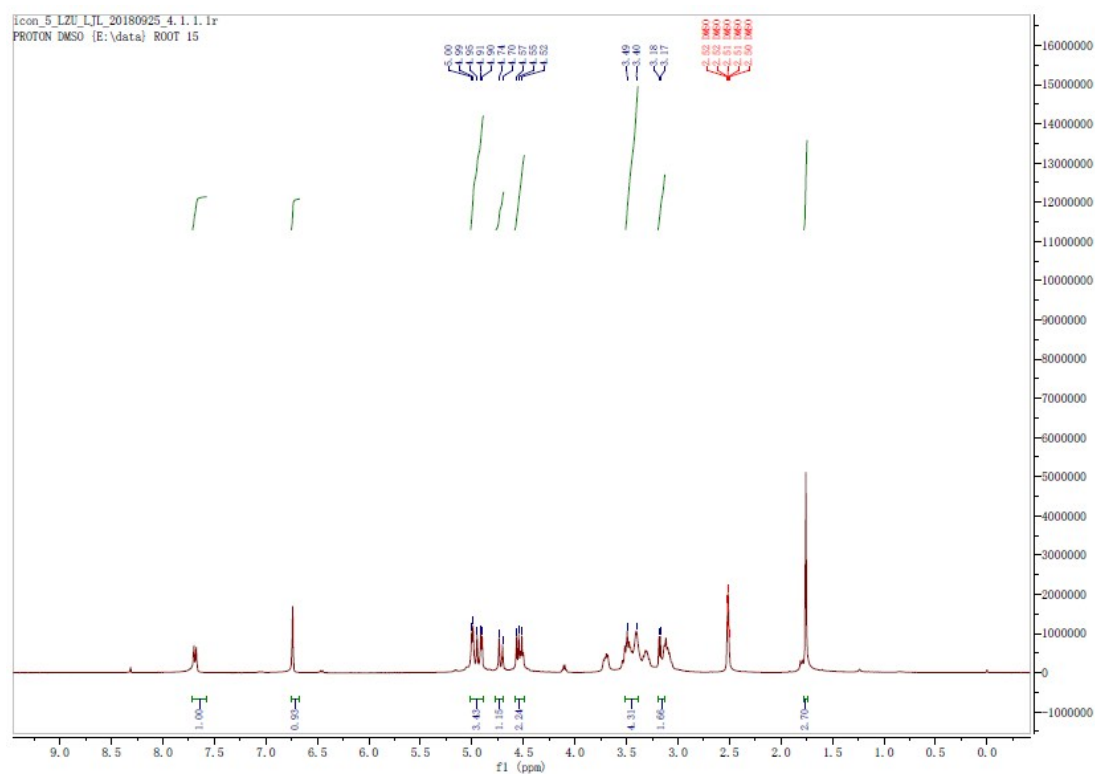

The  $^{13}\text{C}$ NMR of complex 9

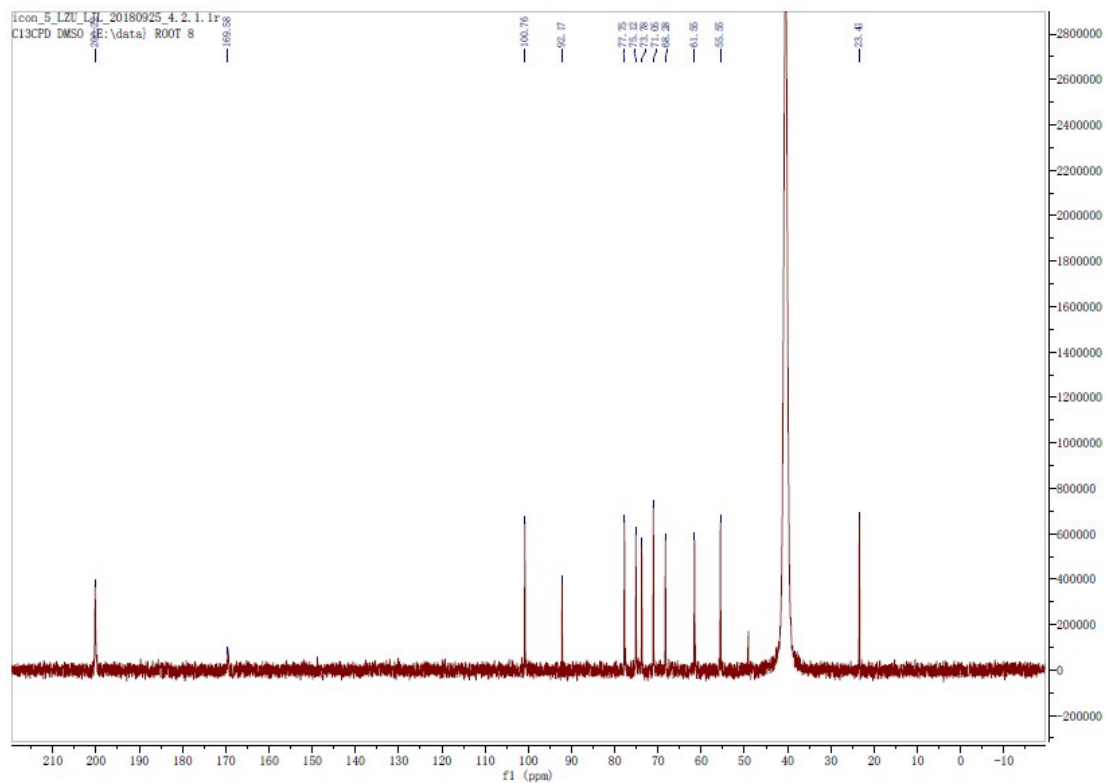

# The ESI-HRMS of complex Ac-9

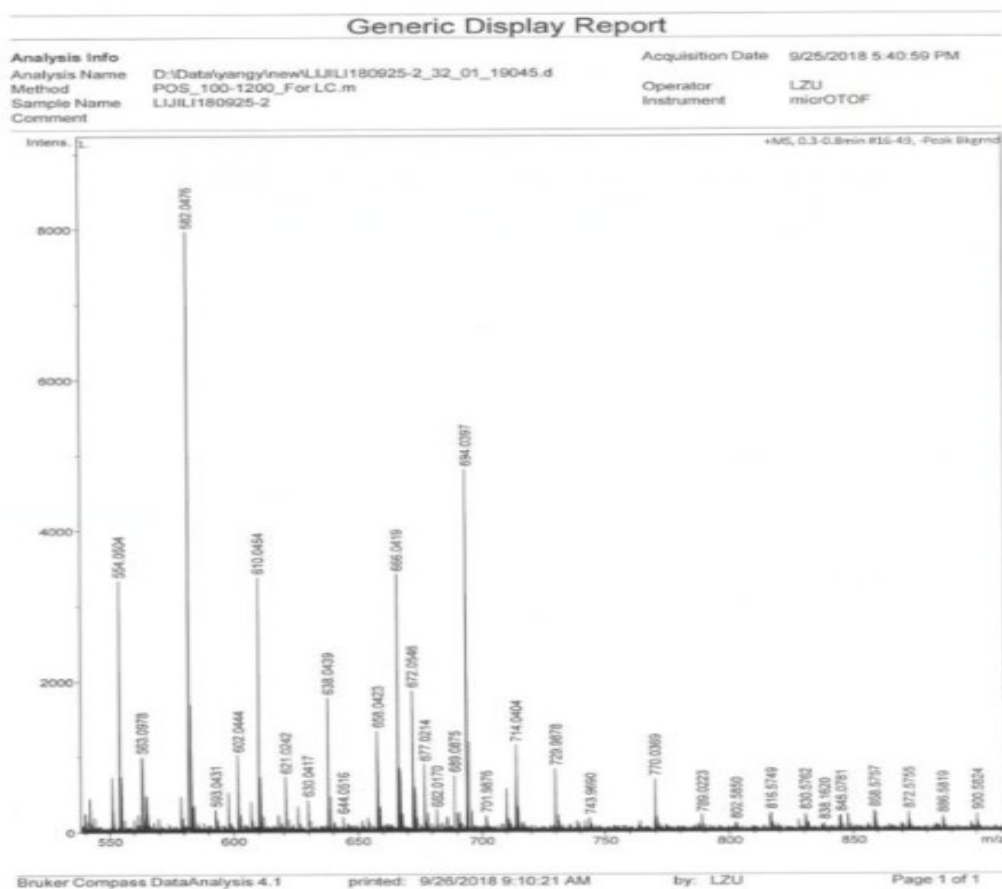

# The $^1\text{H}$ -NMR of complex Ac-9

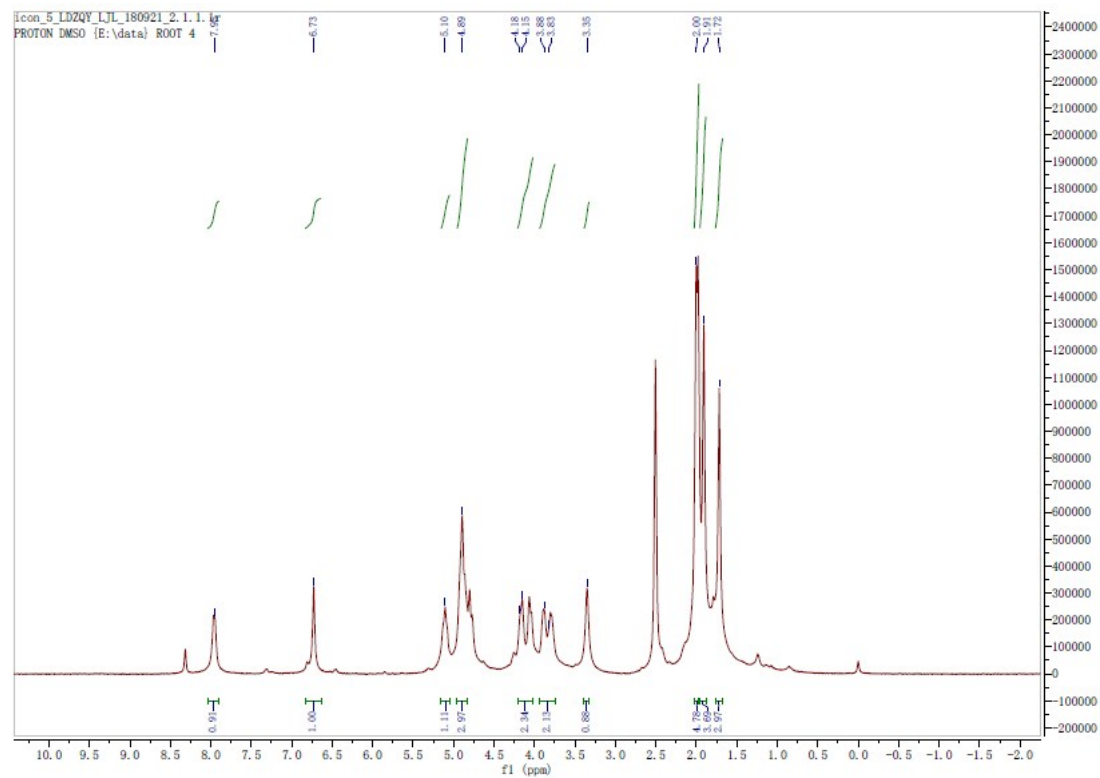

## The $^{13}\text{C}$ NMR of complex Ac-9

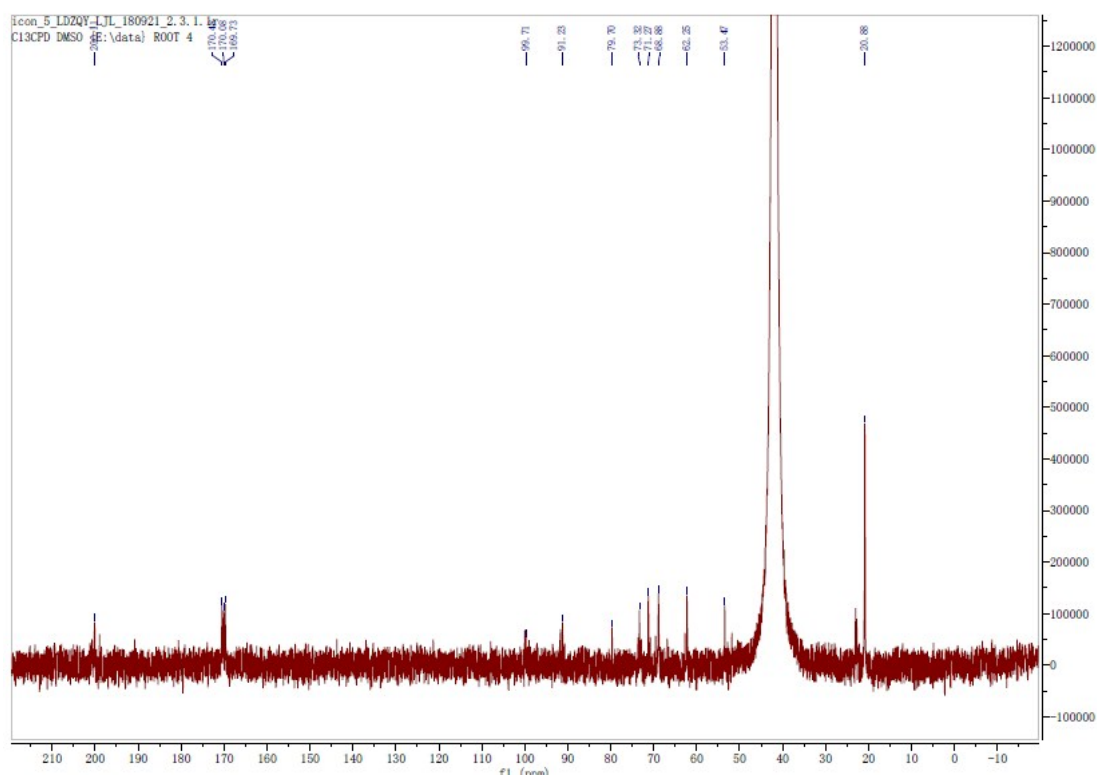

## The ESI-HRMS of complex 10

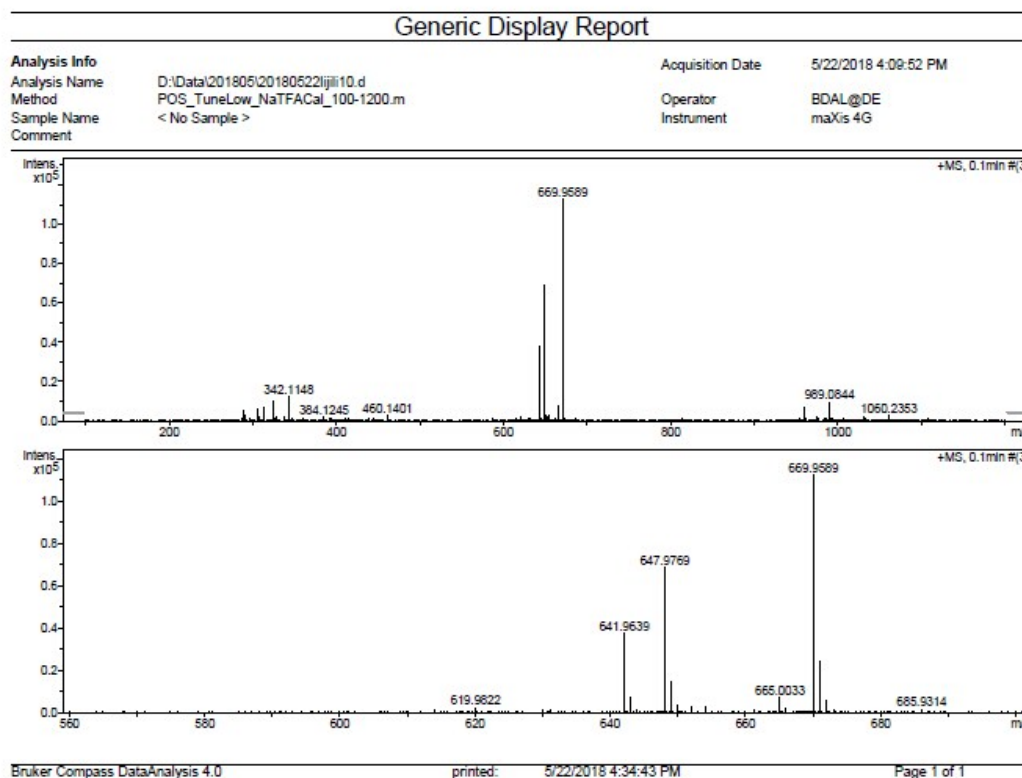



# The $^1\text{H}$ -NMR of complex 10

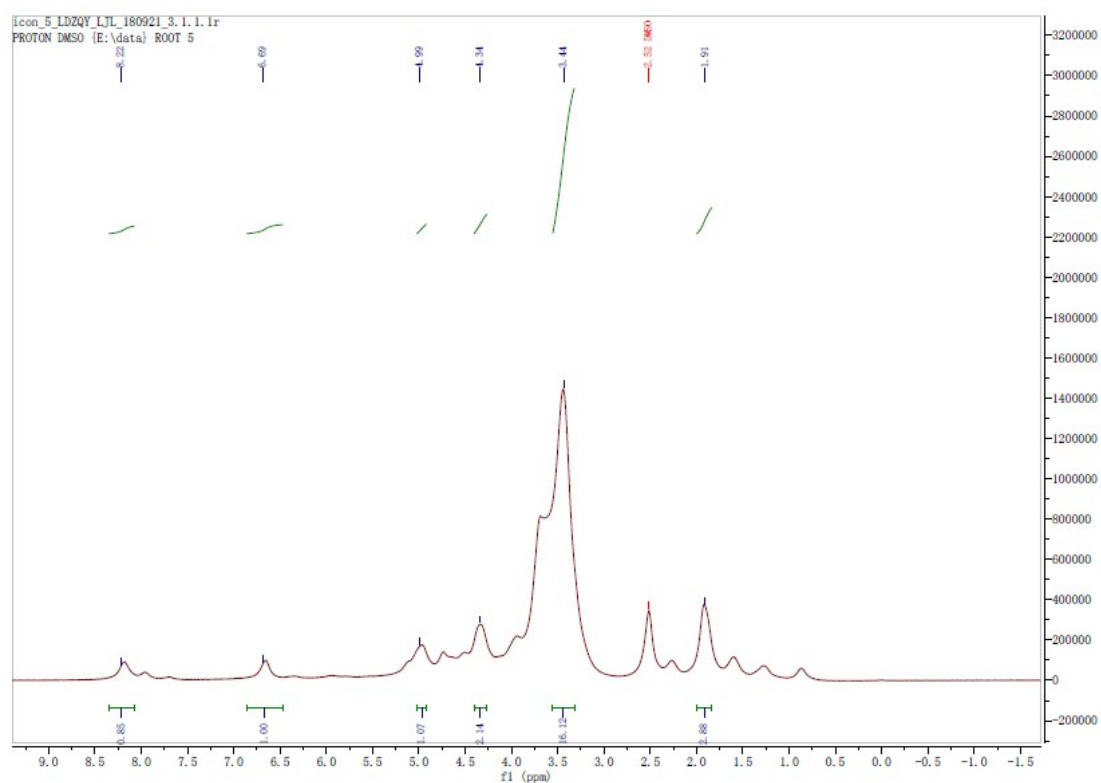

# The $^{13}\text{C}$ NMR of complex 10

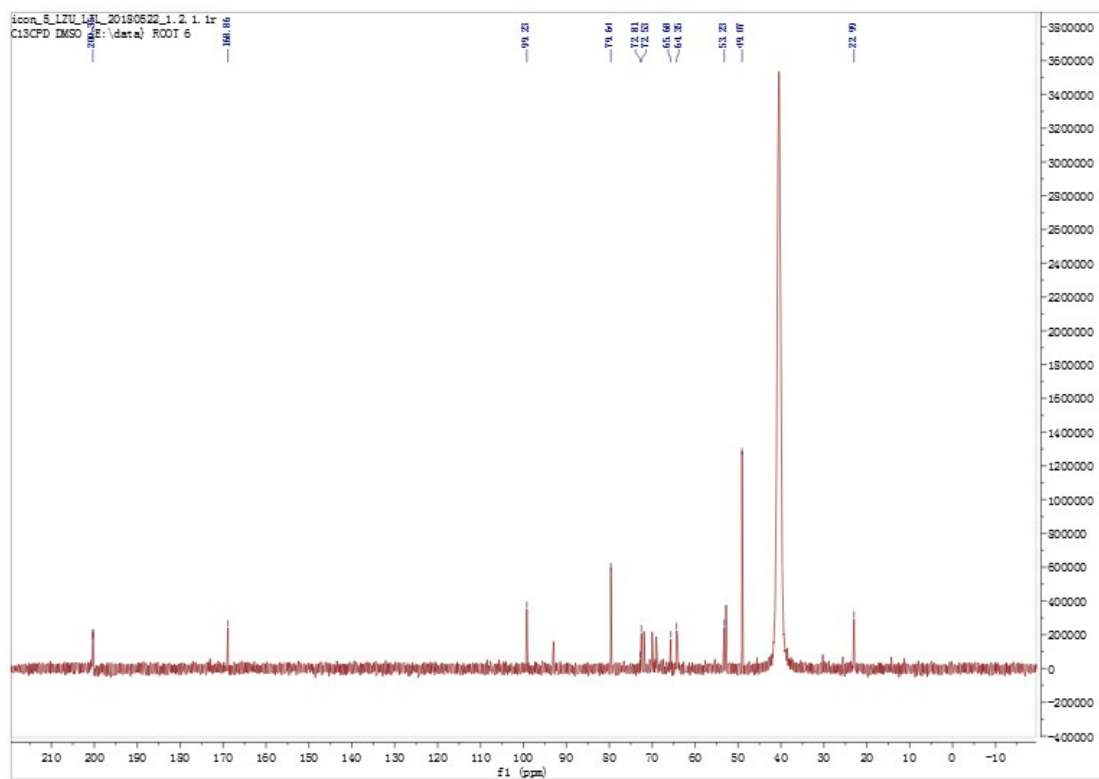

## The ESI-HRMS of complex Ac-10

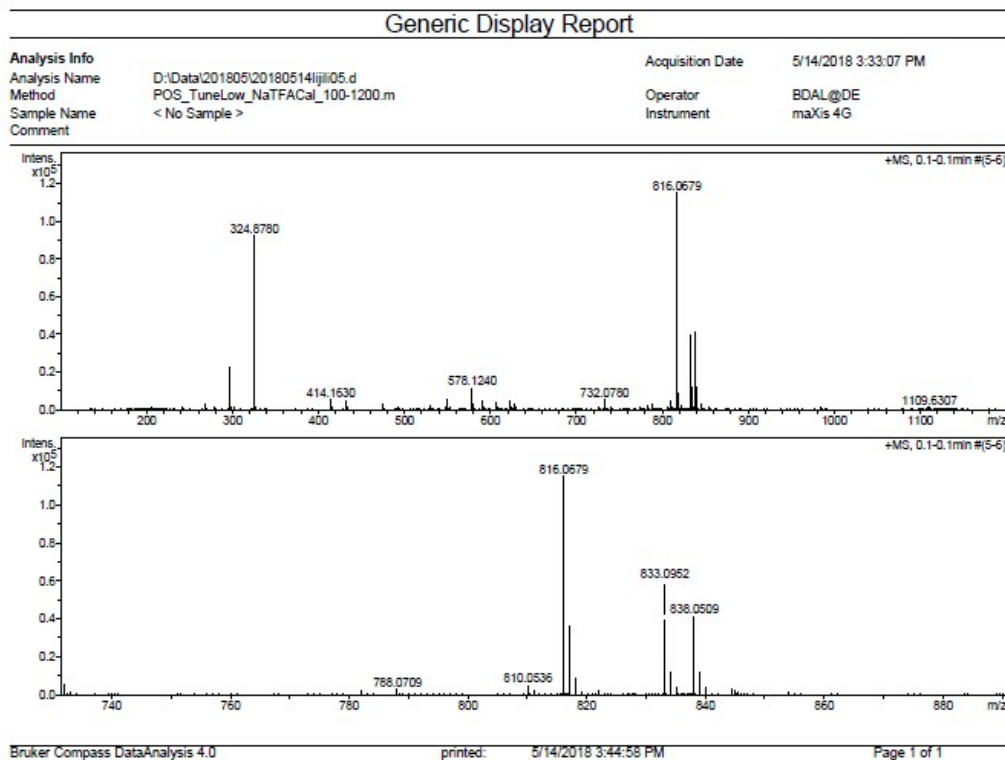

## The $^1\text{H}$ -NMR of complex Ac-10

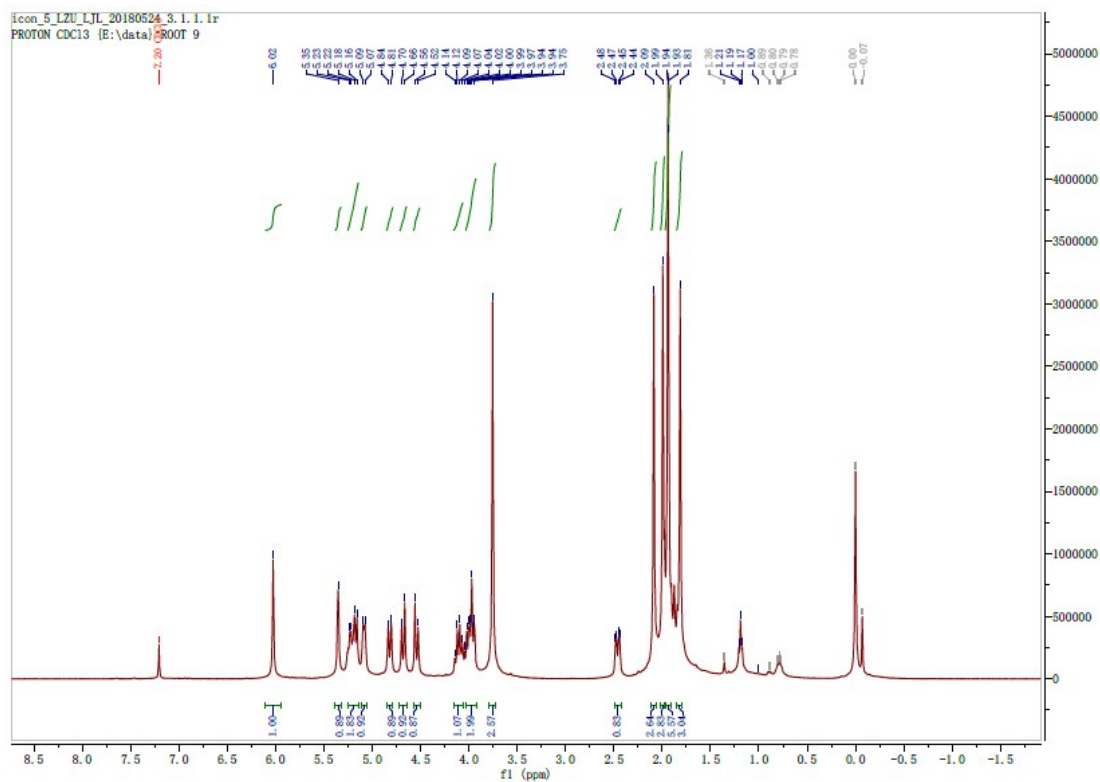

# The $^{13}\text{C}$ NMR of complex Ac-10

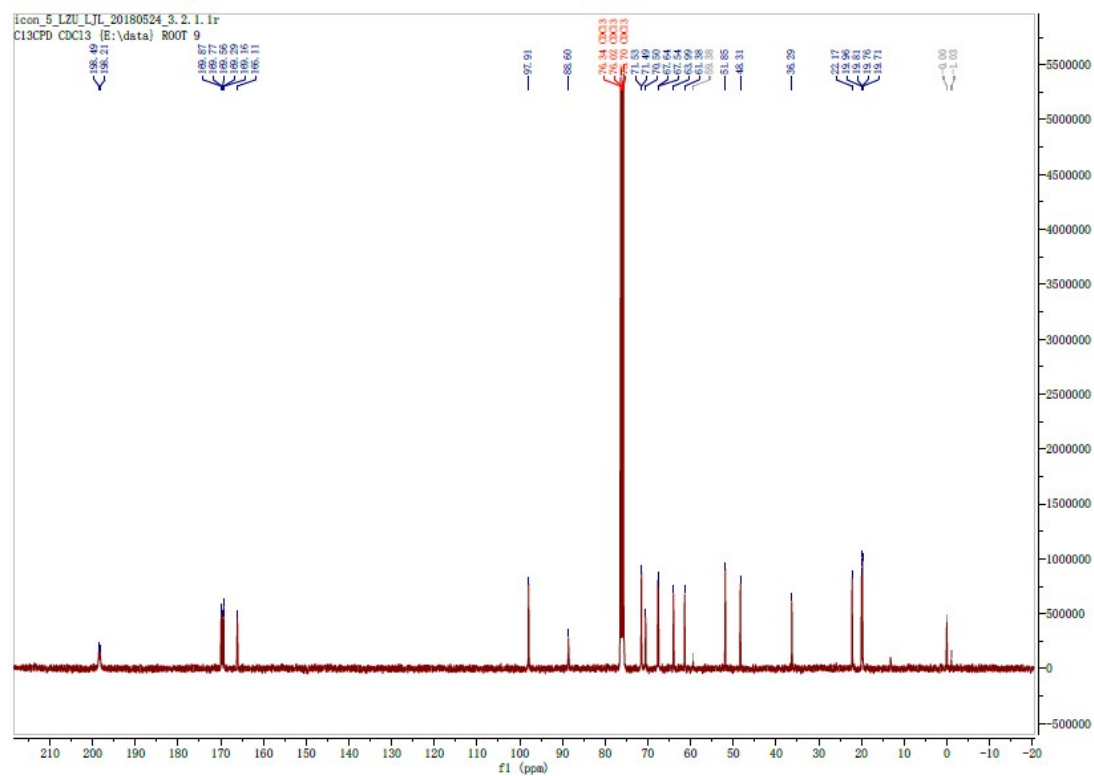

Supplement: c8ob01921e1.pdf [file c8ob01921e1.pdf]
